# Supplementary material for: An Efficient Selectfluor-Mediated Oxidative Thio- and Selenocyanation of Diversely Substituted Indoles and Carbazoles
Source: Hindawi journal article supplement (doi:10.1155/2019/1459681), 2019-01-02

## **An Efficient Selectfluor-Mediated Oxidative Thio- and Seleno-Cyanation of Diversely Substituted Indoles and Carbazoles**

Rodrigo Abonia,<sup>a</sup> Luisa F. Gutierrez,<sup>a,b</sup> Angela T. Zwarycz,<sup>b</sup> Sebastian Correa Smits,<sup>b</sup> Kenneth K. Laali<sup>\*b</sup>

<sup>a</sup>Research Group of Heterocyclic Compounds (GICH), Department of Chemistry, Universidad del Valle, A. A. 25360, Cali, Colombia

<sup>b</sup>Department of Chemistry, University of North Florida, 1 UNF Drive, Jacksonville, FL 32224, USA<sup>b</sup>

<sup>\*</sup>Kenneth.Laali@unf.edu

Fig S1.  $^1\text{H}$  and  $^{13}\text{C}$  NMR spectra of the compound 2

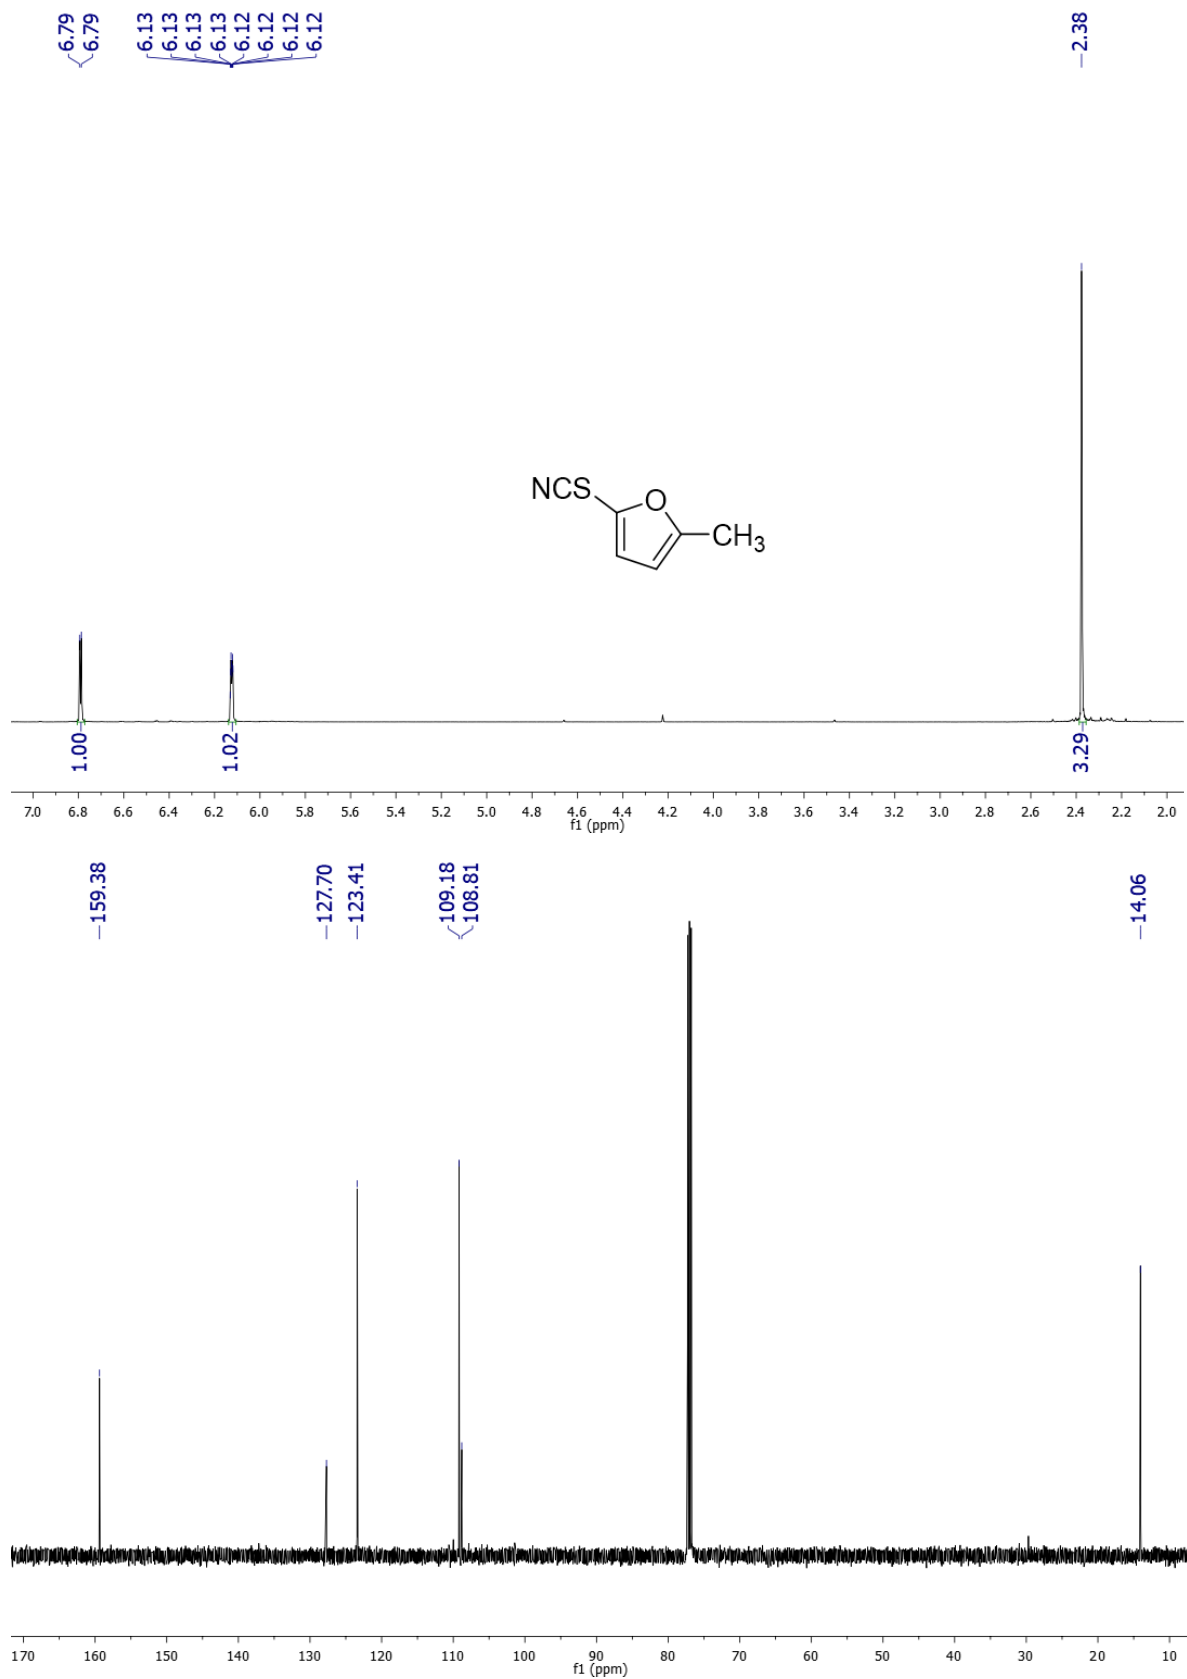

Fig S2.  $^1\text{H}$  and  $^{13}\text{C}$  NMR spectra of the compound 4a

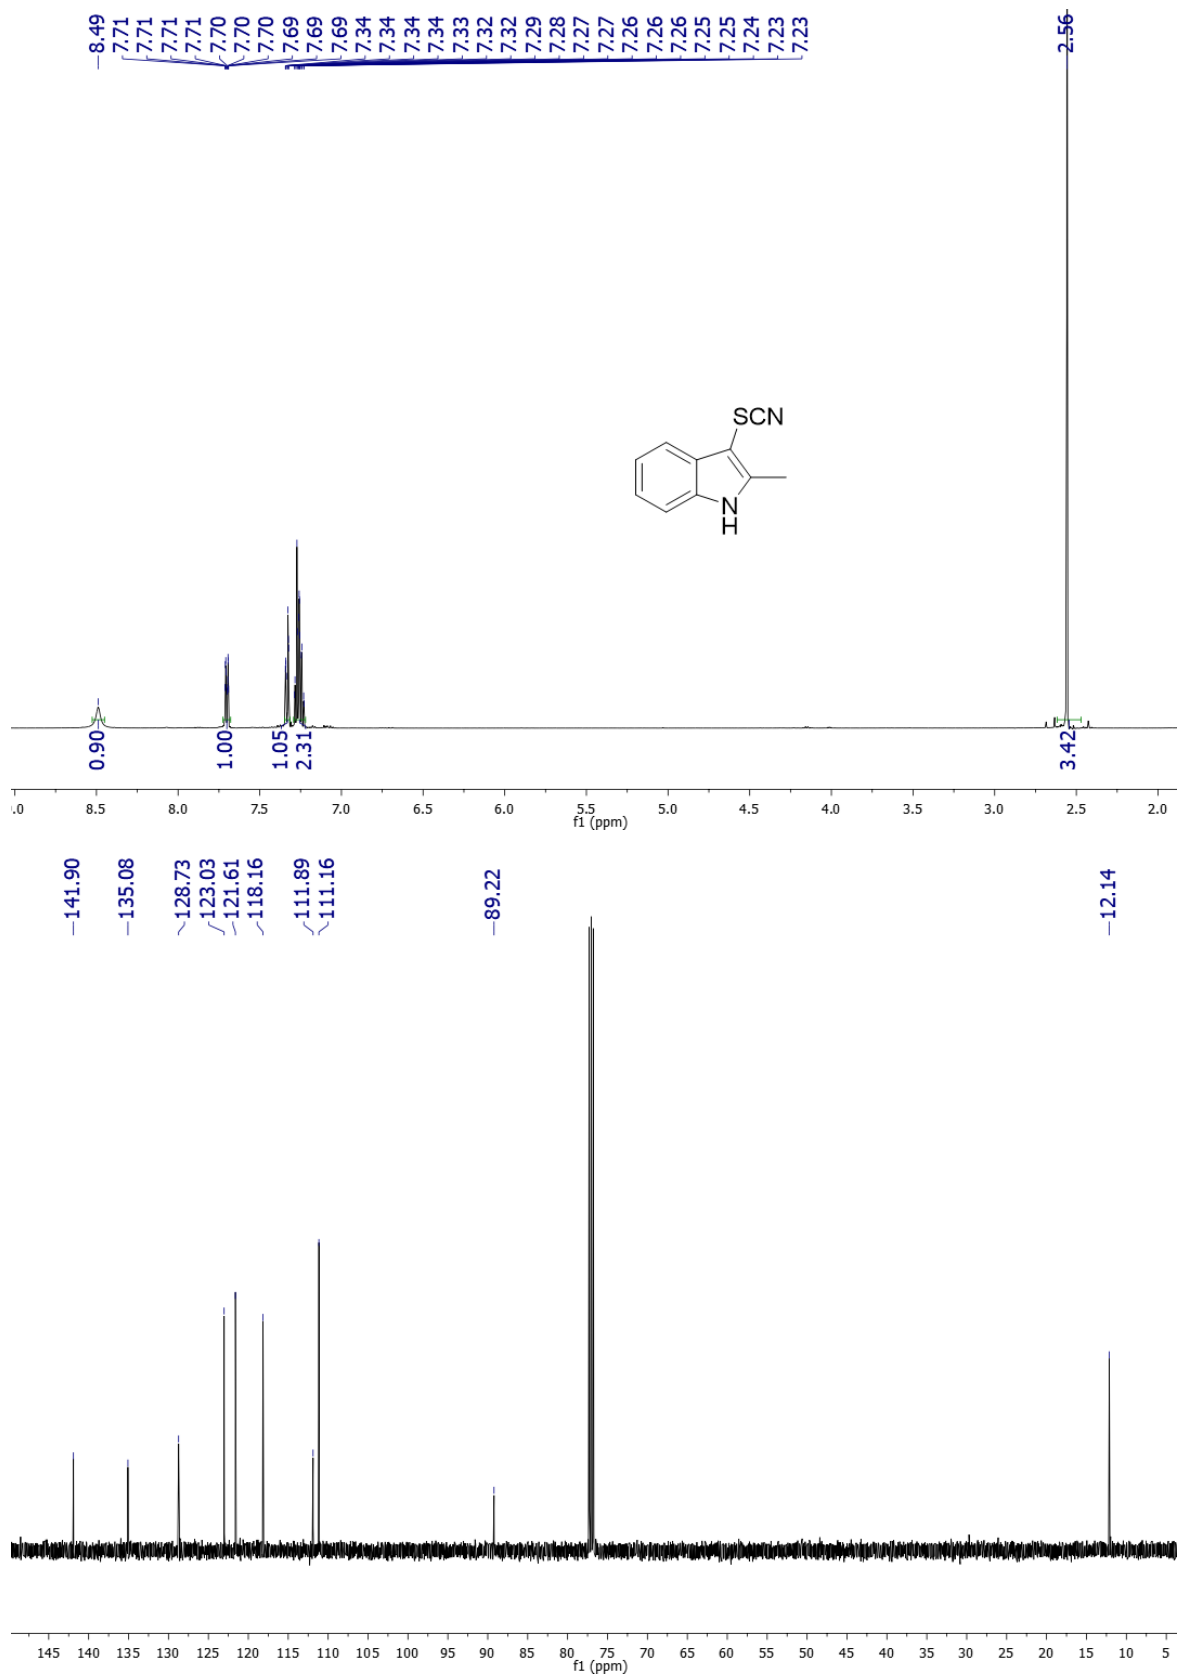

Fig S3.  $^1\text{H}$  and  $^{13}\text{C}$  NMR spectra of the compound 4b

indole-4-cho-3-scN  
Pulse Sequence: s2pul  
Solvent: acetone  
Temp. 25.0 C / 298.1 K  
VNMRS-500 "chem-60682"

Relax. delay 1.000 sec  
Pulse 45.0 degrees  
Acq. time 2.045 sec  
Width 8012.8 Hz  
32 repetitions  
OBSERVE H1, 499.7094623 MHz  
DATA PROCESSING  
FT size 32768  
Total time 1 min, 37 sec

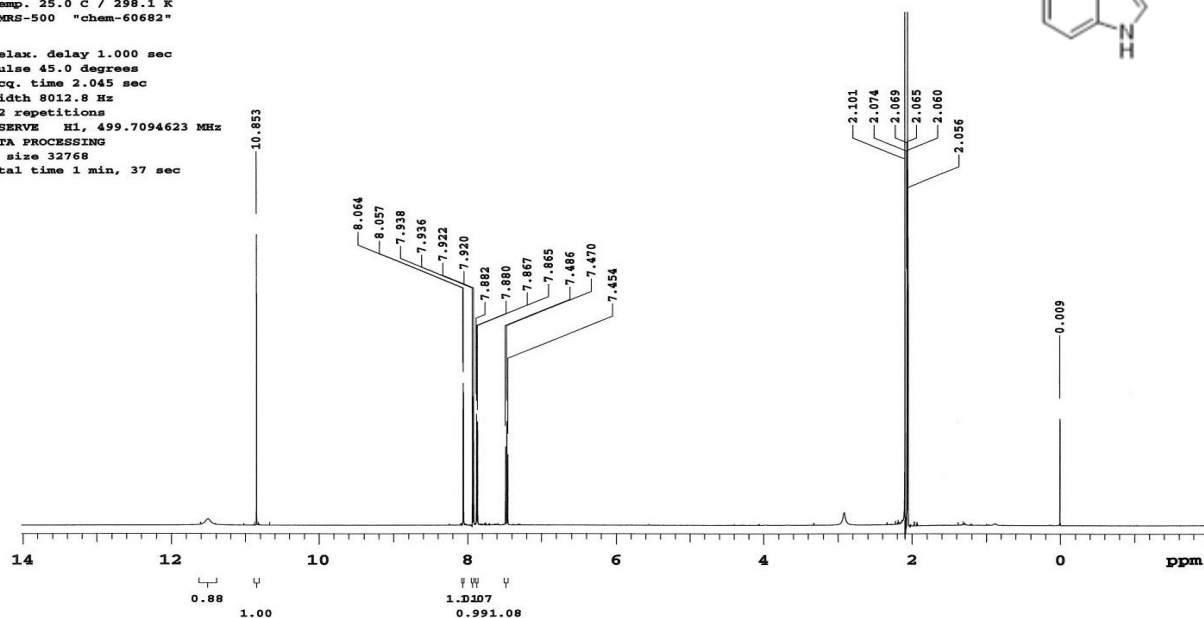

indole-4-cho-3scN  
Pulse Sequence: s2pul  
Solvent: acetone  
Temp. 25.0 C / 298.1 K  
User: 1-14-87  
VNMRS-500 "chem-60682"

Relax. delay 1.000 sec  
Pulse 45.0 degrees  
Acq. time 1.049 sec  
Width 31250.0 Hz  
1920 repetitions  
OBSERVE C13, 125.6520442 MHz  
DECOUPLE H1, 499.7119609 MHz  
Power 44 dB  
continuously on  
WALTZ-16 modulated  
DATA PROCESSING  
Line broadening 0.5 Hz  
FT size 65536  
Total time 1 hr, 5 min, 33 sec

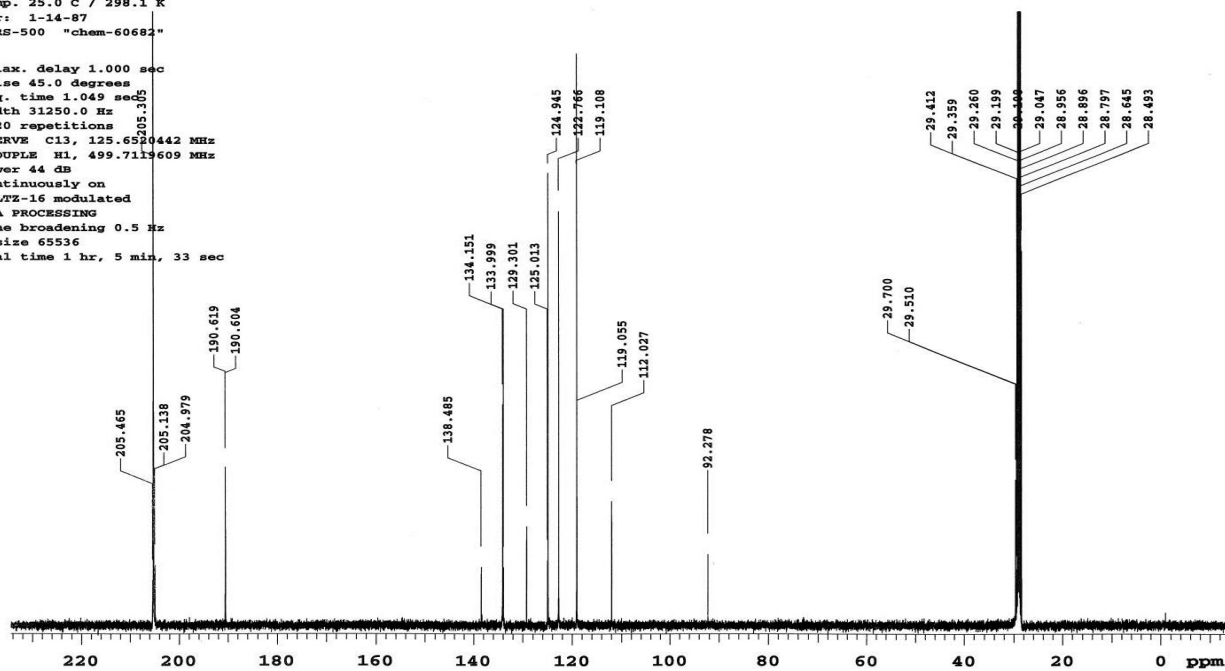

Fig S4.  $^1\text{H}$  and  $^{13}\text{C}$  NMR spectra of the compound 4c

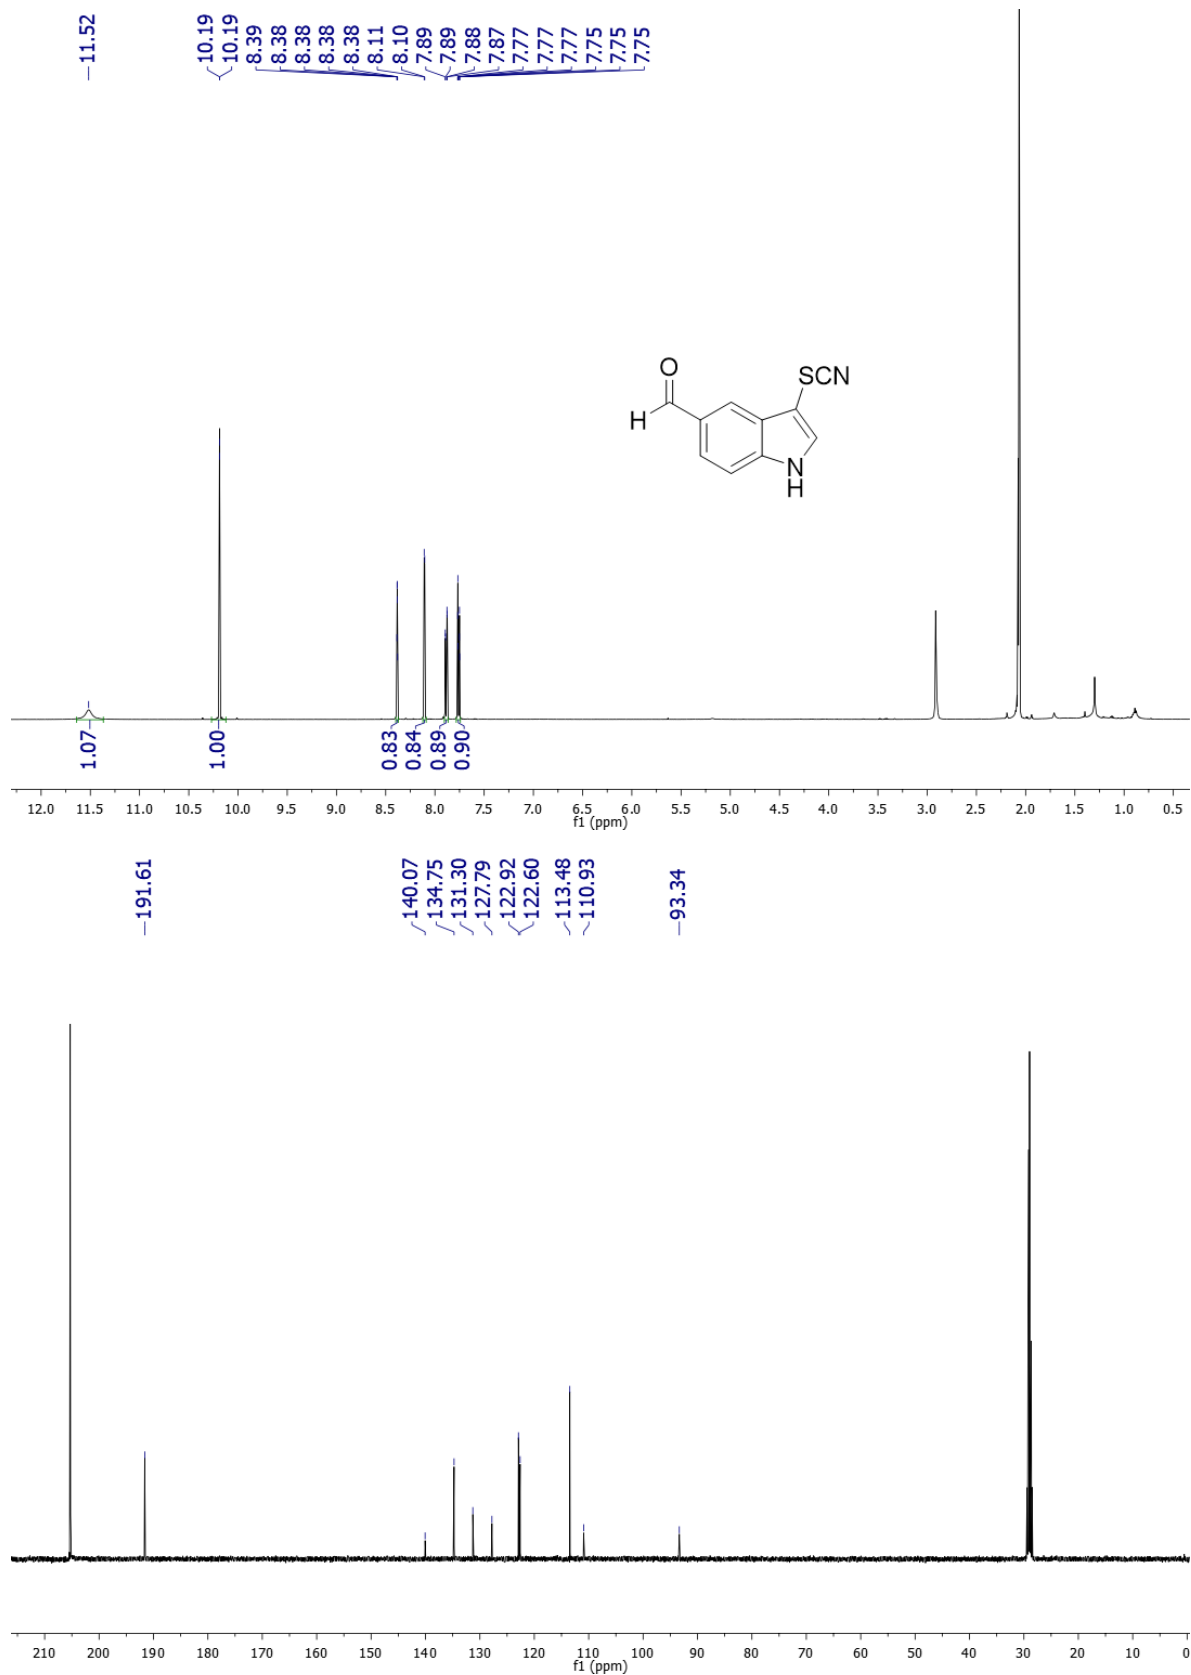

Fig S5.  $^1\text{H}$ ,  $^{13}\text{C}$  and  $^{77}\text{Se}$  NMR spectra of the compound 5c

Indole\_5-SeCN\_Reaction\_2

Pulse Sequence: s2pul

Solvent: dmsc  
Temp. 25.0 C / 298.1 K  
VNMRS-500 "chem-60682"

Relax. delay 1.000 sec  
Pulse 45.0 degrees  
Acq. time 2.045 sec  
Width 8012.8 Hz  
32 repetitions  
OBSERVE H1, 499.7092424 MHz  
DATA PROCESSING  
FT size 32768  
Total time 1 min, 37 sec

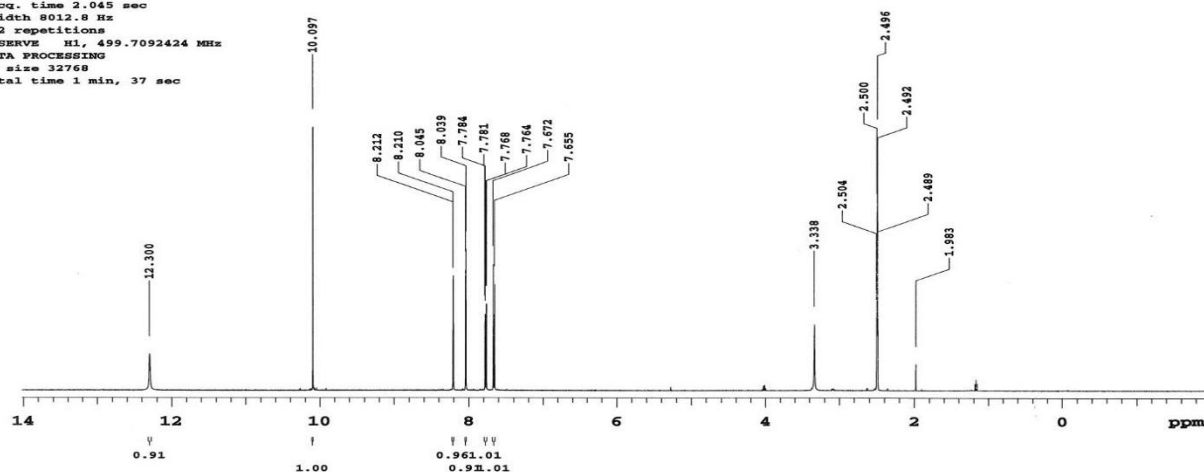

Indole\_5-SeCN\_C13

Pulse Sequence: s2pul

Solvent: dmsc  
Temp. 25.0 C / 298.1 K  
User: 1-14-87  
VNMRS-500 "chem-60682"

Relax. delay 1.000 sec  
Pulse 45.0 degrees  
Acq. time 1.049 sec  
Width 31250.0 Hz  
1088 repetitions  
OBSERVE C13, 125.6519890 MHz  
DECOUPLE H1, 499.7117410 MHz  
Power 44 dB  
continuously on  
WALTZ-16 modulated  
DATA PROCESSING  
Line broadening 0.5 Hz  
FT size 65536  
Total time 37 min, 9 sec

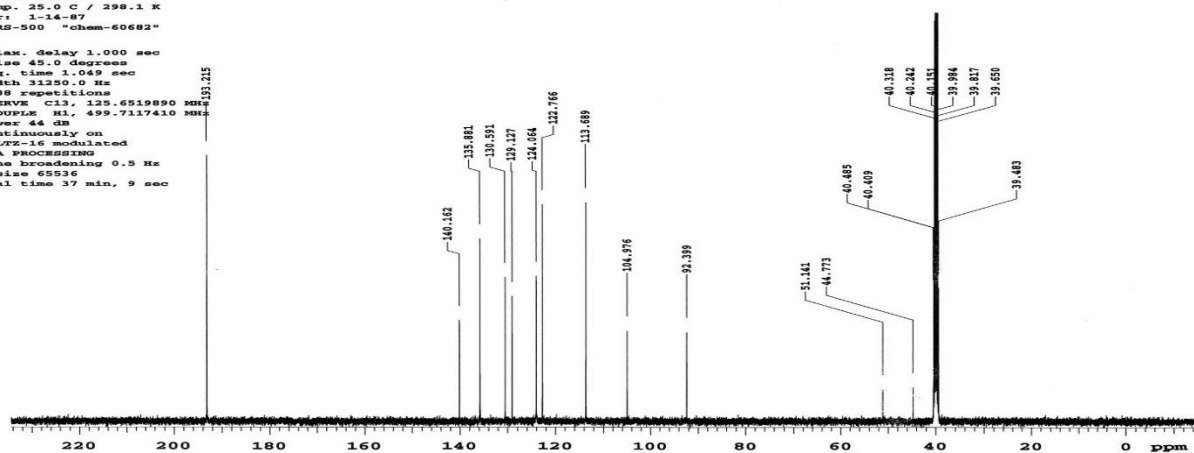

SeCN\_15\_alid

Pulse Sequence: s2pul

Solvent: cdcl3  
Temp. 25.0 C / 298.1 K  
User: 1-14-87  
VNMRS-500 "chem-60682"

Relax. delay 25.000 sec  
Pulse 45.0 degrees  
Acq. time 1.311 sec  
Width 50000.0 Hz  
32 repetitions  
OBSERVE Se77, 95.3016605 MHz  
DECOUPLE H1, 499.7093674 MHz  
Power 44 dB  
continuously on  
WALTZ-16 modulated  
DATA PROCESSING  
Line broadening 0.5 Hz  
FT size 131072  
Total time 14 min, 2 sec

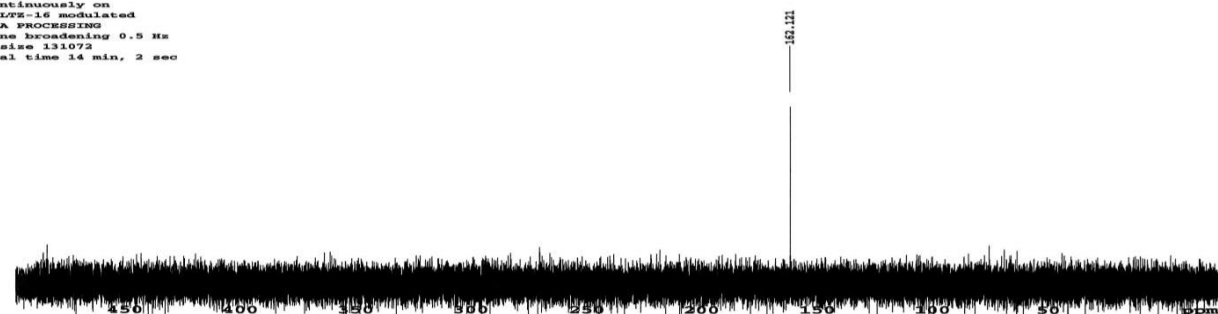

Fig S6.  $^1\text{H}$  and  $^{13}\text{C}$  NMR spectra of the compound 4d

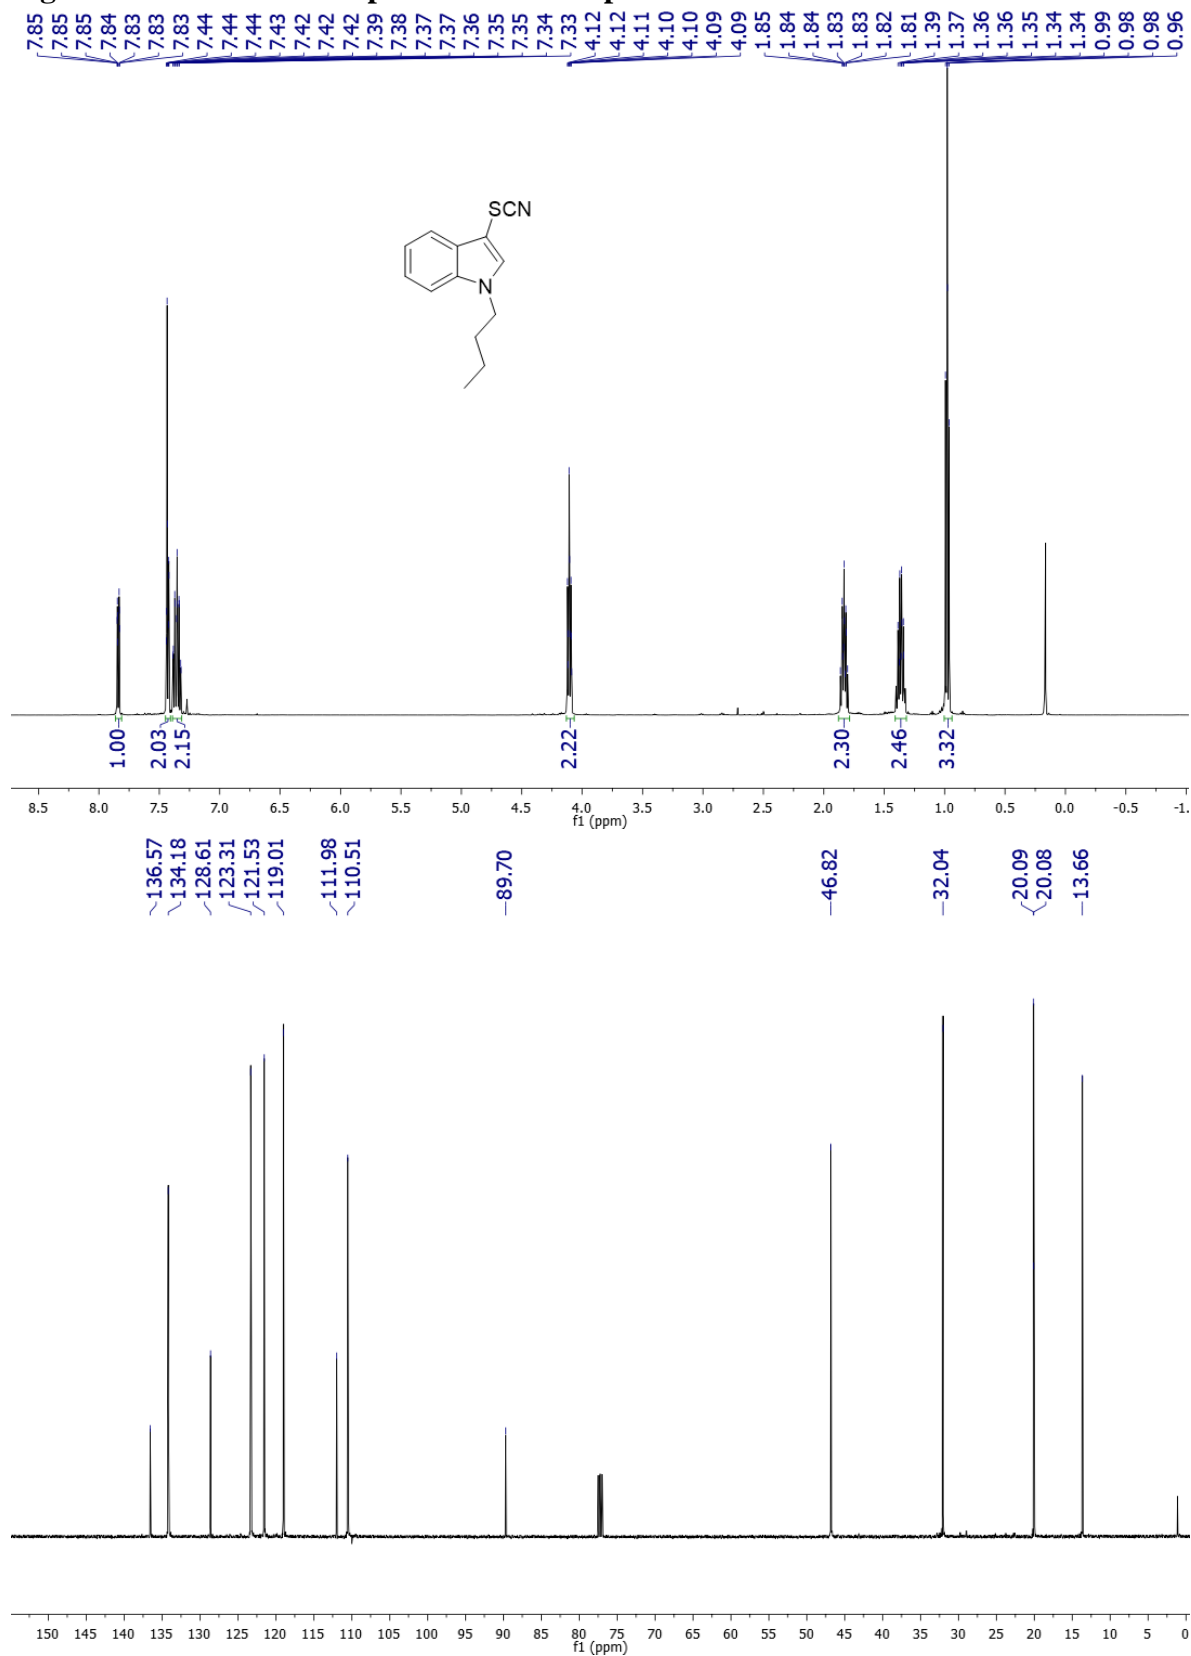

Fig S7.  $^1\text{H}$ ,  $^{13}\text{C}$  and  $^{77}\text{Se}$  NMR spectra of the compound 5d

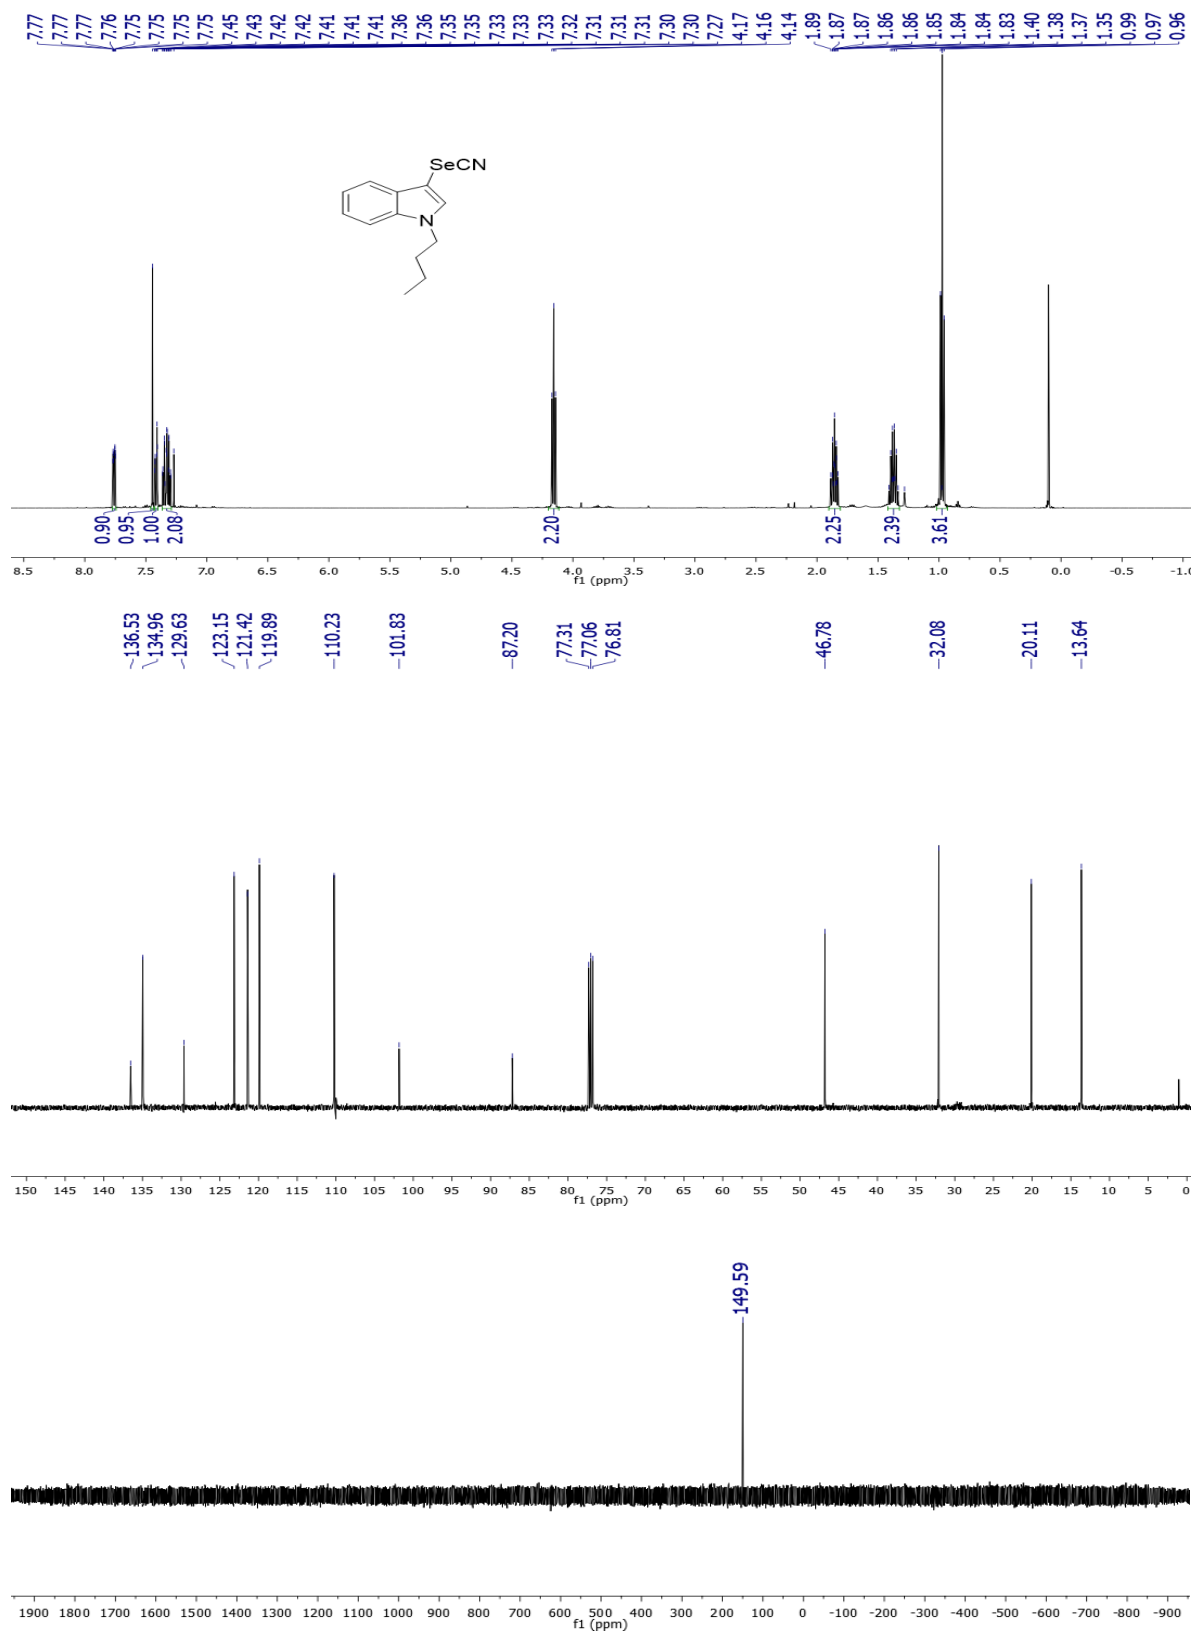



Fig S8.  $^1\text{H}$  and  $^{13}\text{C}$  NMR spectra of the compound 4e

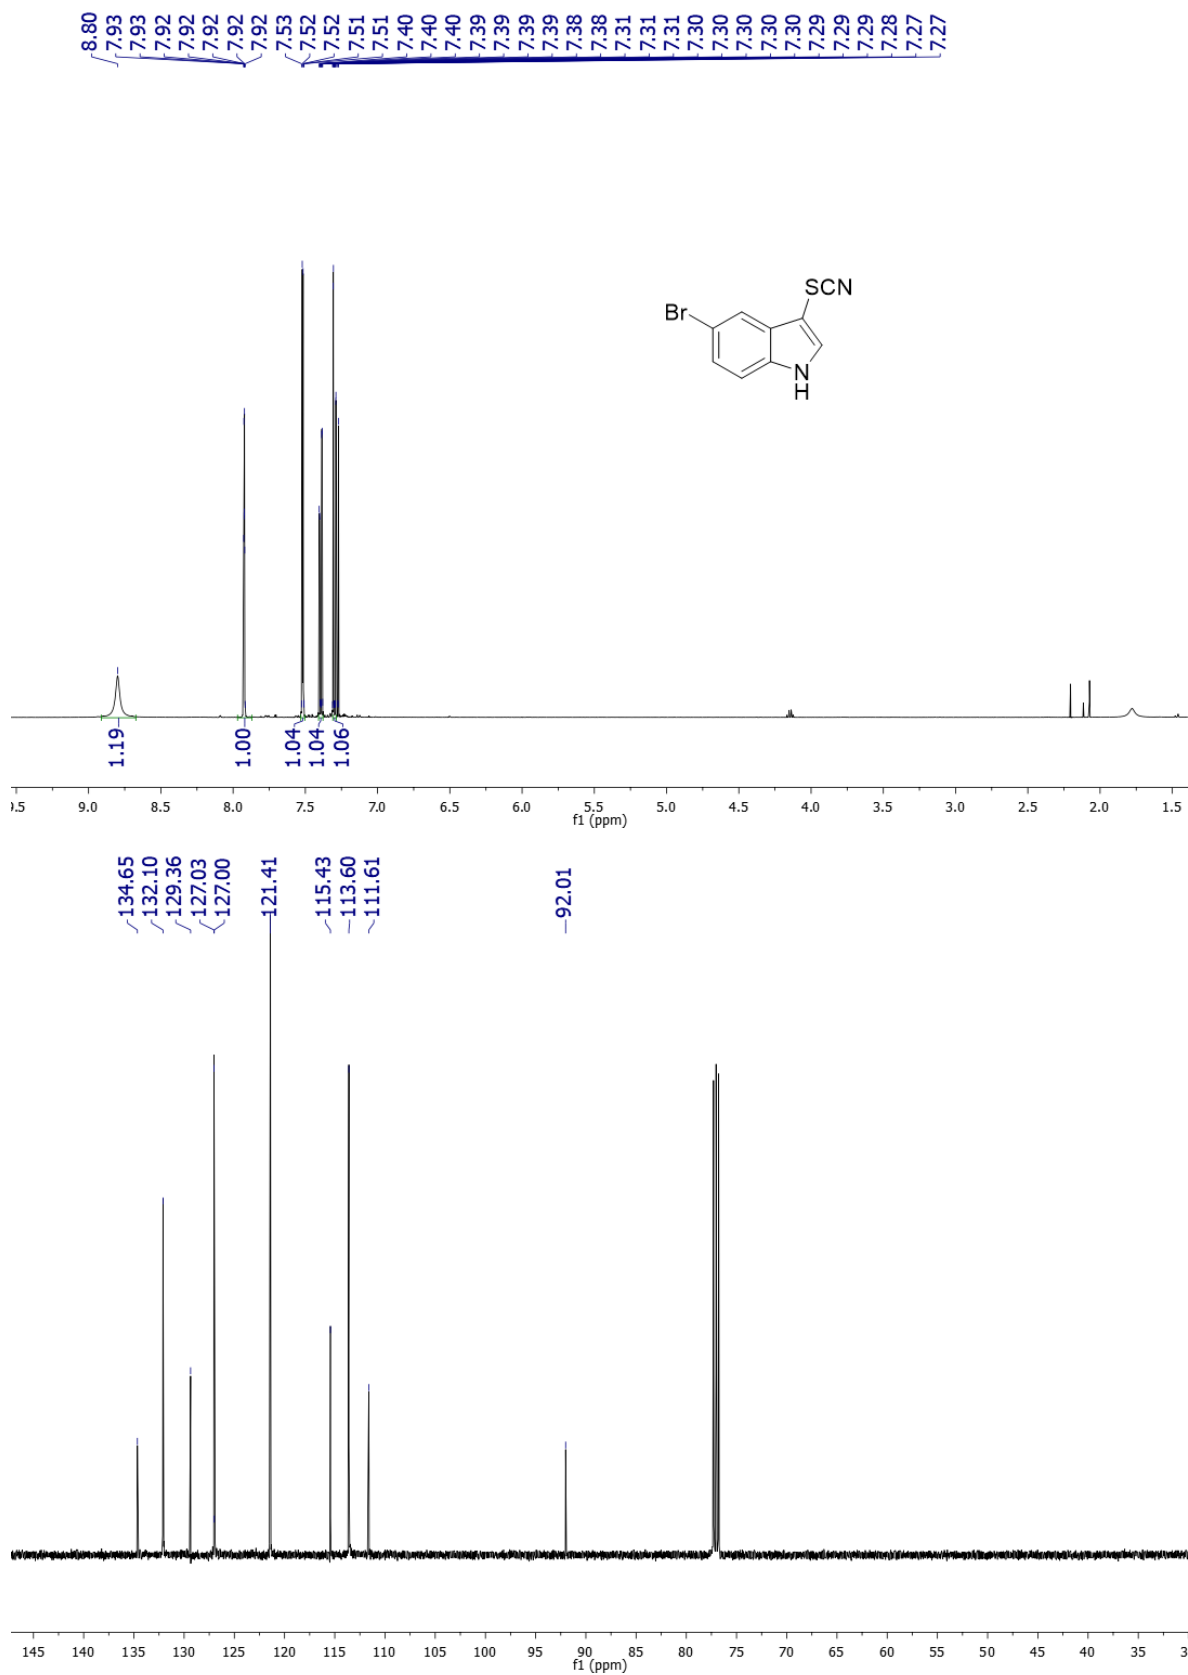

Fig S9.  $^1\text{H}$ ,  $^{13}\text{C}$  and  $^{77}\text{Se}$  NMR spectra of the compound 5e

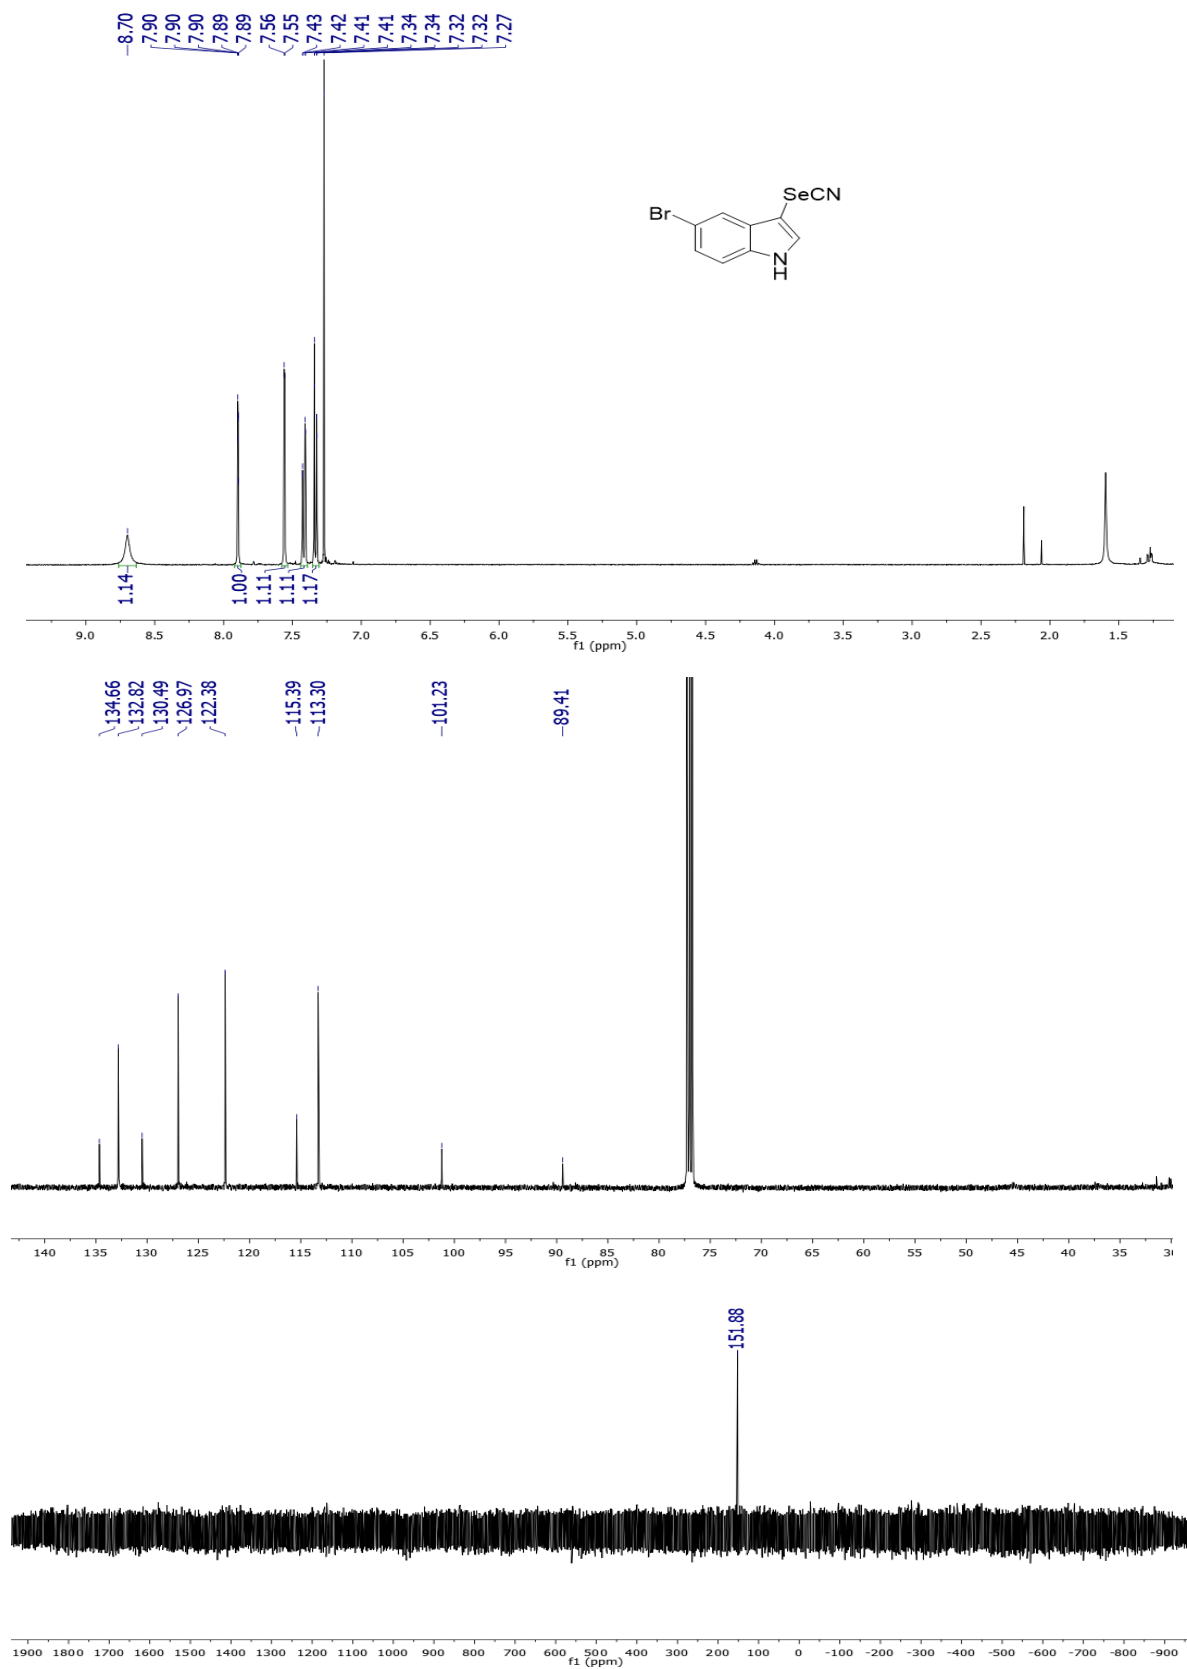

Fig S10.  $^1\text{H}$ ,  $^{19}\text{F}$  and  $^{13}\text{C}$  NMR spectra of the compound 4f

5-F-Indole-3-SCN\_Column\_Purified

Pulse Sequence: s2pul  
Solvent: acetone  
Temp. 25.0 C / 298.1 K  
VNSRS-500 "chem-60682"  
Relax. delay 1.000 sec  
Pulse 45.0 degrees  
Acq. time 2.045 sec  
Width 8012.8 Hz  
32 repetitions  
OBSERVE H1, 499.7094623 MHz  
DATA PROCESSING  
FT size 32768  
Total time 1 min, 37 sec

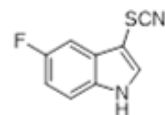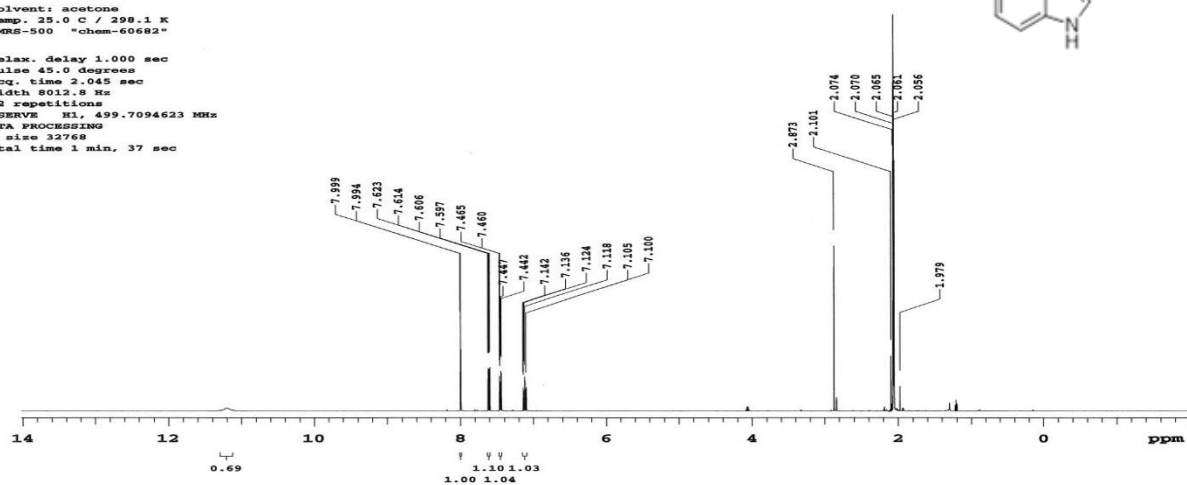

5-F-Indole-3-SCN\_Column\_Purified

Pulse Sequence: s2pul  
Solvent: acetone  
Temp. 25.0 C / 298.1 K  
VNSRS-500 "chem-60682"  
Relax. delay 1.000 sec  
Pulse 30.0 degrees  
Acq. time 0.603 sec  
Width 106.7 kHz  
16 repetitions  
OBSERVE F19, 470.1966764 MHz  
DATA PROCESSING  
FT size 131072  
Total time 0 min, 26 sec

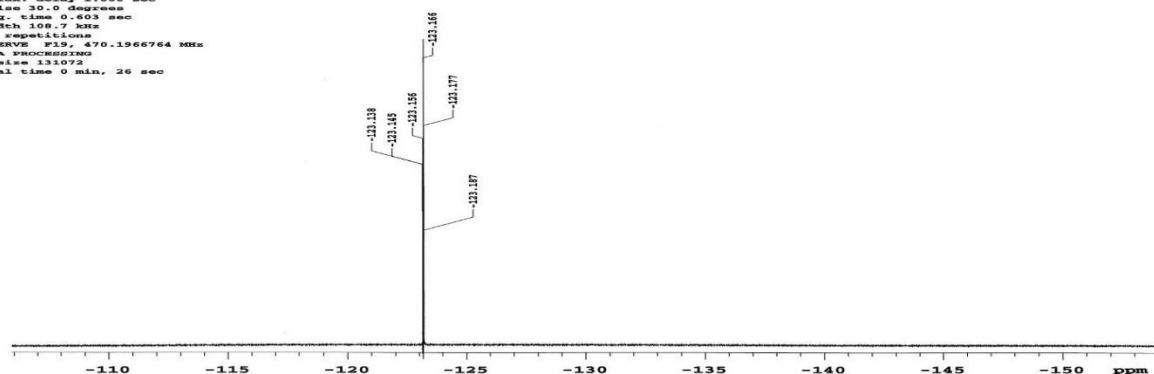

5-F-Indole-3SCN\_C13

Pulse Sequence: s2pul  
Solvent: acetone  
Temp. 25.0 C / 298.1 K  
User: 1-14-87  
VNSRS-500 "chem-60682"  
Relax. delay 1.000 sec  
Pulse 45.0 degrees  
Acq. time 1.049 sec  
Width 31220.0 Hz  
3220 repetitions  
OBSERVE C13, 125.629442 MHz  
DECOUPLE H1, 499.711609 MHz  
Power 44 dB  
continuously on  
WALTZ-16 modulated  
DATA PROCESSING  
Line broadening 0.5 Hz  
FT size 65536  
Total time 2 hr, 11 sec

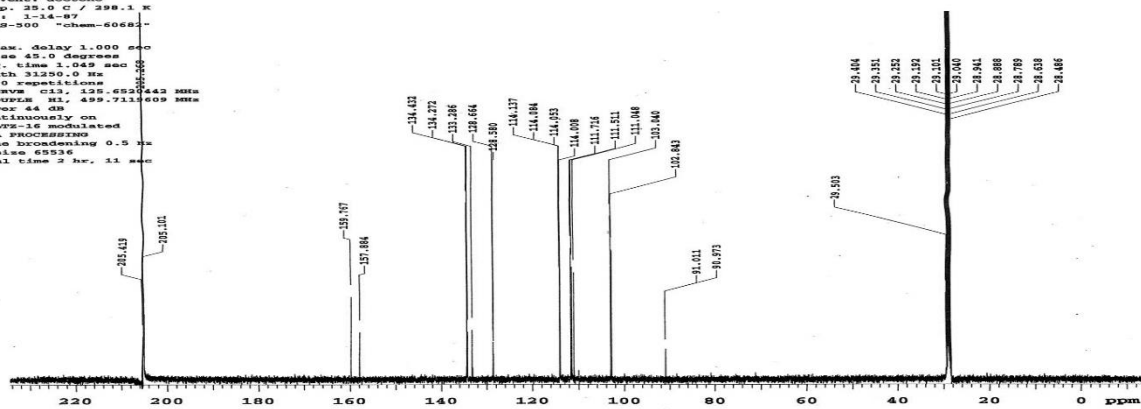

Fig S11.  $^1\text{H}$ ,  $^{19}\text{F}$ ,  $^{13}\text{C}$  and  $^{77}\text{Se}$  NMR spectra of the compound 5f

5-F-3-SeCN\_Indole  
Pulse Sequence: s2pul  
Solvent: acetone  
Temp. 25.0 C / 298.1 K  
VNMRS-500 "chem-60682"

Relax. delay 1.000 sec  
Pulse 45.0 degrees  
Acq. time 2.045 sec  
Width 8012.8 Hz  
32 repetitions  
OBSERVE H1, 499.7094623 MHz  
DATA PROCESSING  
FT size 32768  
Total time 1 min, 37 sec

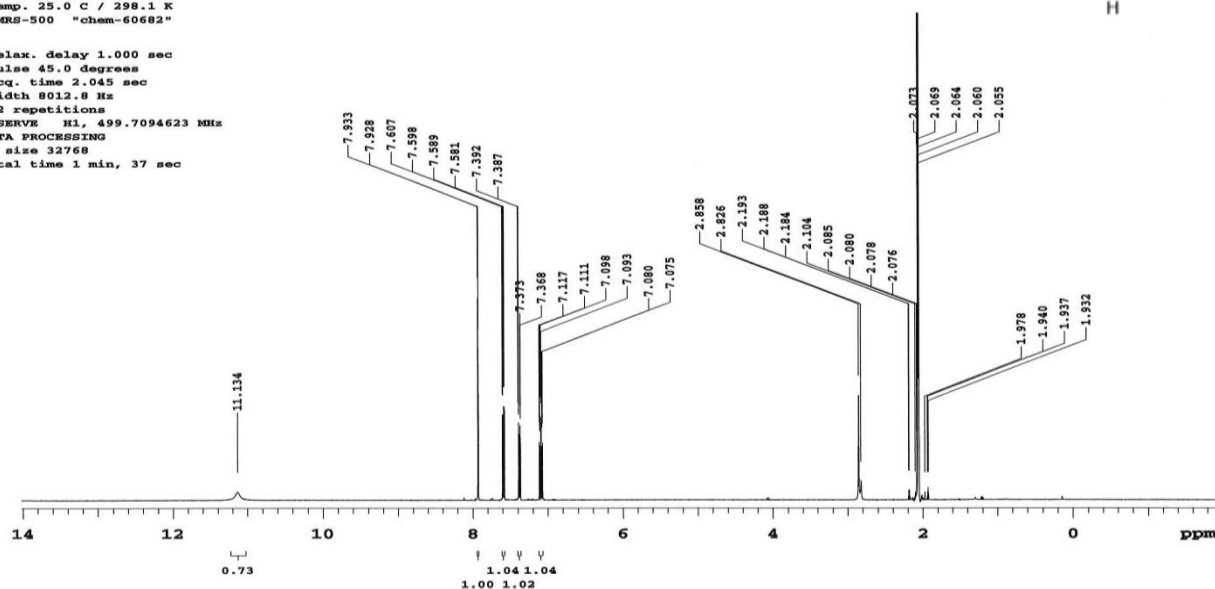

5-F-3-SeCN\_Indole  
Pulse Sequence: s2pul  
Solvent: acetone  
Temp. 25.0 C / 298.1 K  
VNMRS-500 "chem-60682"

Relax. delay 1.000 sec  
Pulse 30.0 degrees  
Acq. time 0.603 sec  
Width 108.7 kHz  
16 repetitions  
OBSERVE F19, 470.1966764 MHz  
DATA PROCESSING  
FT size 131072  
Total time 0 min, 26 sec

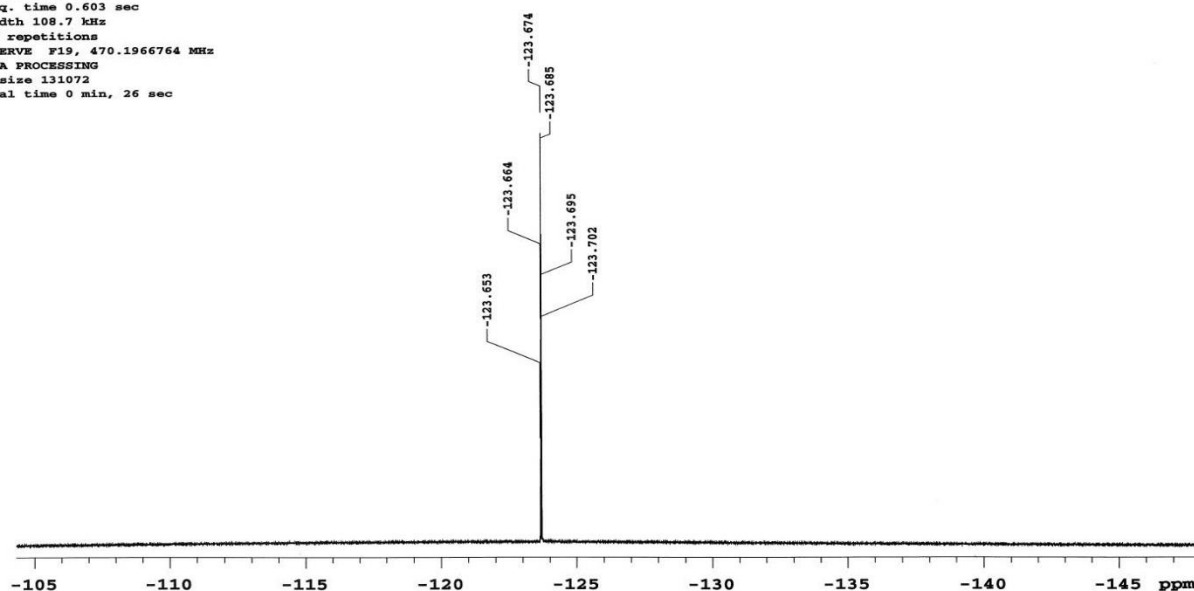

-F-3-SeCN\_Indole

Pulse Sequence: s2pul  
Solvent: acetone  
Temp. 25.0 C / 298.1 K  
User: 1-14-87  
VNMRS-500 "chem-60682"

Relax. delay 1.000 sec  
Pulse 45.0 degrees  
Acq. time 1.049 sec  
Width 31250.0 Hz  
3200 repetitions  
OBSERVE C13, 125.6520442 MHz  
DECOUPLE H1, 499.7119609 MHz  
Power 44 dB  
continuously on  
WALTZ-16 modulated  
DATA PROCESSING  
Line broadening 0.5 Hz  
FT size 65536  
Total time 1 hr, 49 min, 15 sec

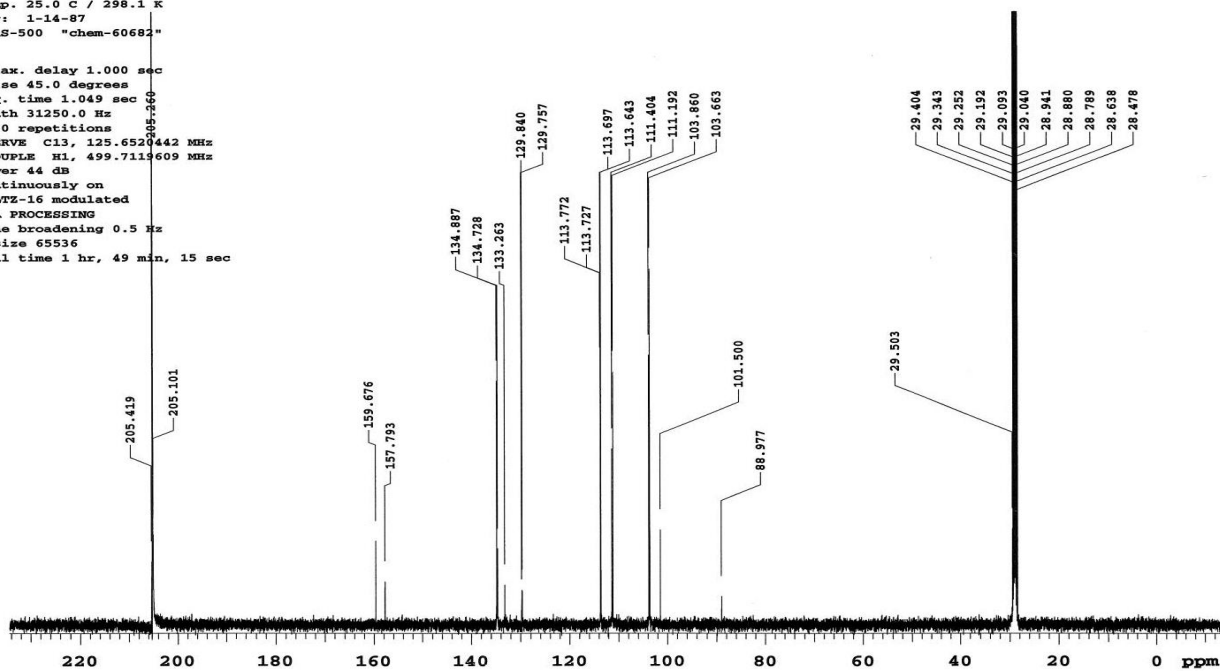

5-F-3-SeCN\_Indole

Pulse Sequence: s2pul  
Solvent: acetone  
Temp. 25.0 C / 298.1 K  
User: 1-14-87  
VNMRS-500 "chem-60682"

Relax. delay 5.000 sec  
Pulse 45.0 degrees  
Acq. time 0.944 sec  
Width 277.8 kHz  
32 repetitions  
OBSERVE Se77, 95.3021551 MHz  
DECOUPLE H1, 499.7119609 MHz  
Power 44 dB  
continuously on  
WALTZ-16 modulated  
DATA PROCESSING  
Line broadening 0.5 Hz  
FT size 524288  
Total time 3 min, 10 sec

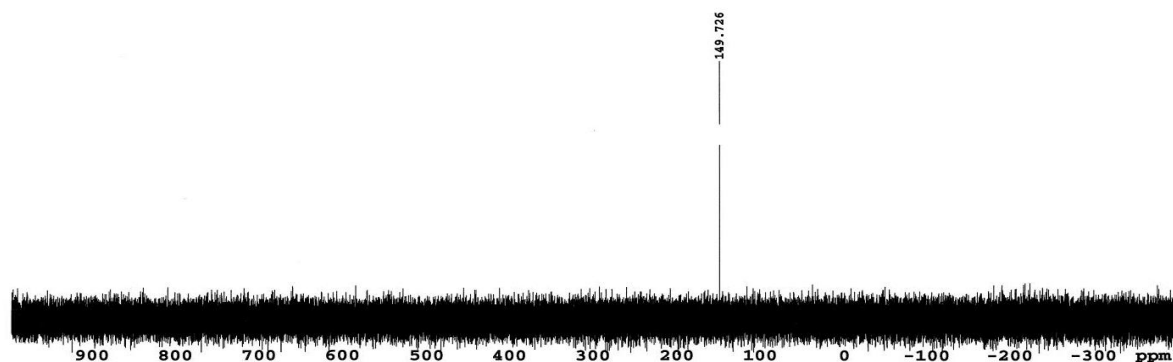

Fig S12.  $^1\text{H}$ ,  $^{19}\text{F}$  and  $^{13}\text{C}$  NMR spectra of the compound 4g

N-Bu-Indole-5-F-3-SCN

Pulse Sequence: s2pul

Solvent: cdcl3

Temp. 25.0 C / 298.1 K

VMRS-500 "chem-60682"

Relax. delay 1.000 sec

Pulse 45.0 degrees

Acq. time 3.045 sec

Width 8012.8 Hz

32 repetitions

OBSERVE M1, 499.7068688 MHz

DATA PROCESSING

FT size 32768

Total time 1 min, 37 sec

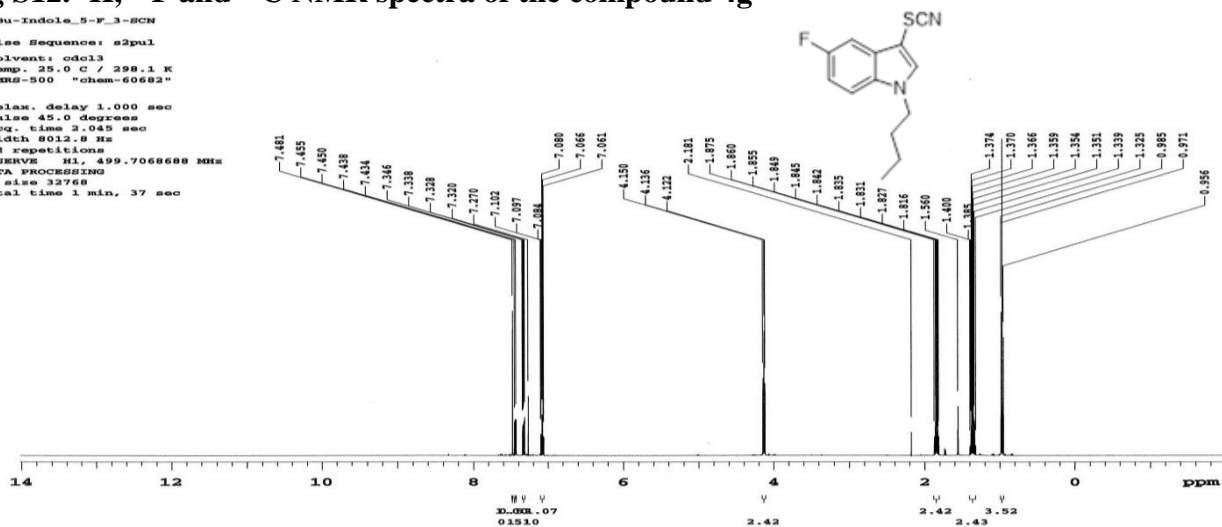

N-Bu-Indole-5-F-3-SCN

Pulse Sequence: s2pul

Solvent: cdcl3

Temp. 25.0 C / 298.1 K

VMRS-500 "chem-60682"

Relax. delay 1.000 sec

Pulse 30.0 degrees

Acq. time 0.603 sec

Width 109.7 kHz

16 repetitions

OBSERVE F19, 470.1942361 MHz

DATA PROCESSING

FT size 131072

Total time 0 min, 26 sec

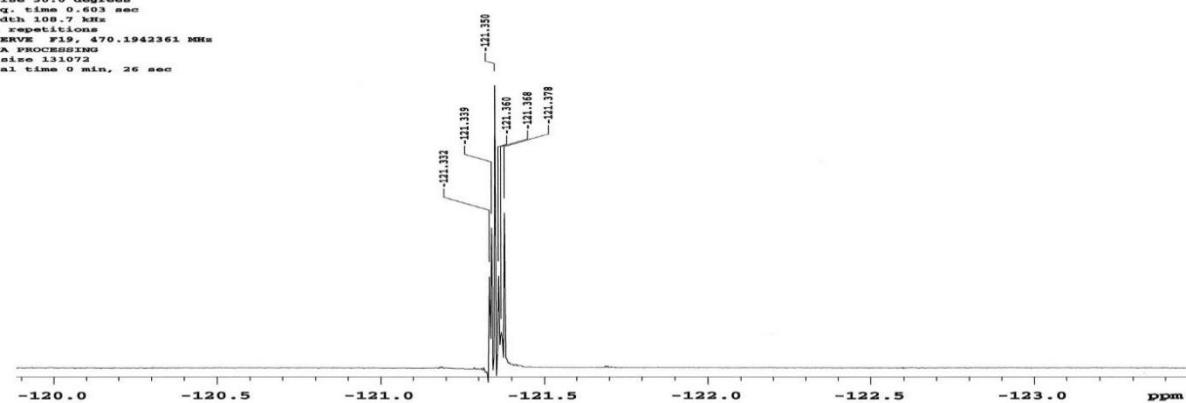

N-Bu-Indole-5-F-3-SCN

Pulse Sequence: s2pul

Solvent: cdcl3

Temp. 25.0 C / 298.1 K

VMRS-500 "chem-60682"

Relax. delay 1.000 sec

Pulse 45.0 degrees

Acq. time 1.049 sec

Width 31250.0 Hz

2944 repetitions

OBSERVE C13, 125.6513921 MHz

DECOUPLE M1, 499.7093674 MHz

Power 44 dB

continuously on

WALTZ-16 modulated

Line broadening 0.5 Hz

FT size 65536

Total time 1 hr, 40 min, 31 sec

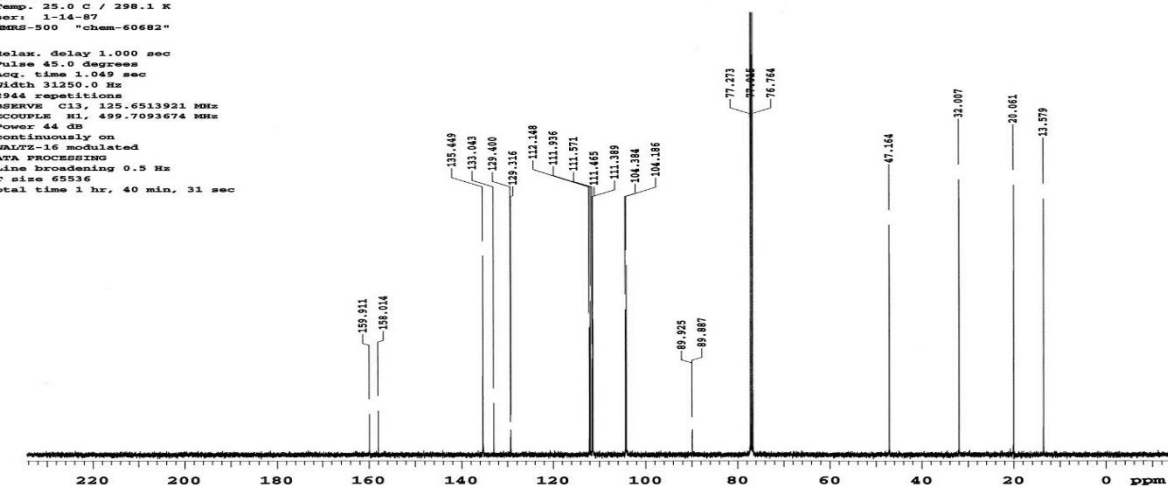

Fig S13.  $^1\text{H}$ ,  $^{19}\text{F}$  and  $^{13}\text{C}$  and  $^{77}\text{Se}$  NMR spectra of the compound 5g

N-Bu\_Indole\_5-F\_3-SeCN

Pulse Sequence: s2pul

Solvent: cdcl3

Temp. 25.0 C / 298.1 K

VNMRS-500 "chem-60682"

Relax. delay 1.000 sec

Pulse 45.0 degrees

Acq. time 2.045 sec

Width 8012.8 Hz

32 repetitions

OBSERVE H1, 499.7068688 MHz

DATA PROCESSING

FT size 32768

Total time 1 min, 37 sec

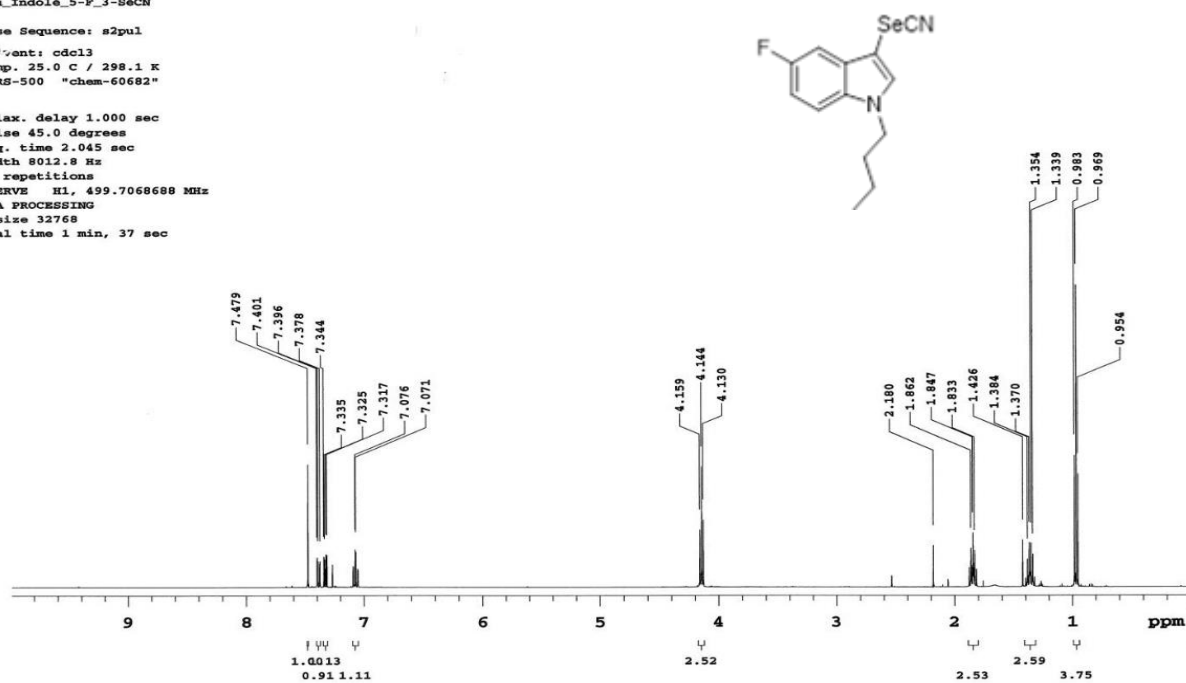

N-Bu\_Indole\_5-F\_3-SeCN

Pulse Sequence: s2pul

Solvent: cdcl3

Temp. 25.0 C / 298.1 K

VNMRS-500 "chem-60682"

Relax. delay 1.000 sec

Pulse 30.0 degrees

Acq. time 0.603 sec

Width 108.7 kHz

16 repetitions

OBSERVE F19, 470.1942361 MHz

DATA PROCESSING

FT size 131072

Total time 0 min, 26 sec

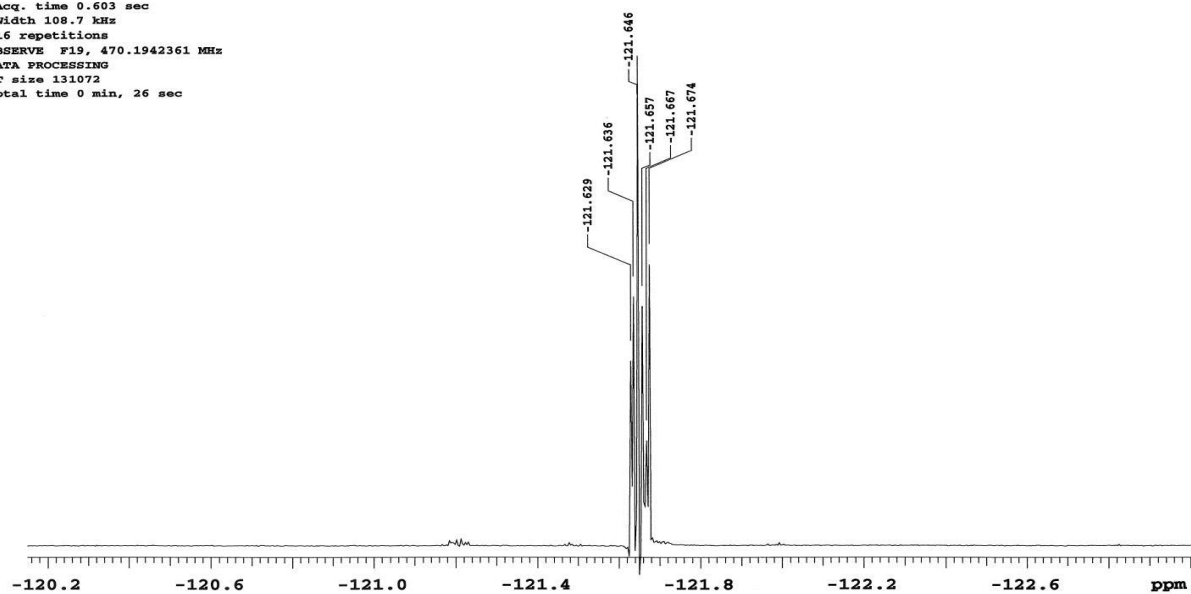

n-Bu-Indole-5F-3SeCN

Pulse Sequence: s2pul

Solvent: cdcl3

Temp. 25.0 C / 298.1 K

User: 1-14-87

VMRS-500 "chem-60682"

Relax. delay 1.000 sec

Pulse 45.0 degrees

Acq. time 1.049 sec

Width 31250.0 Hz

3392 repetitions

OBSERVE C13, 125.6513921 MHz

DECOUPLE H1, 499.7093674 MHz

Power 44 dB

continuously on

WALTZ-16 modulated

DATA PROCESSING

Line broadening 0.5 Hz

FT size 65536

Total time 1 hr, 55 min, 49 sec

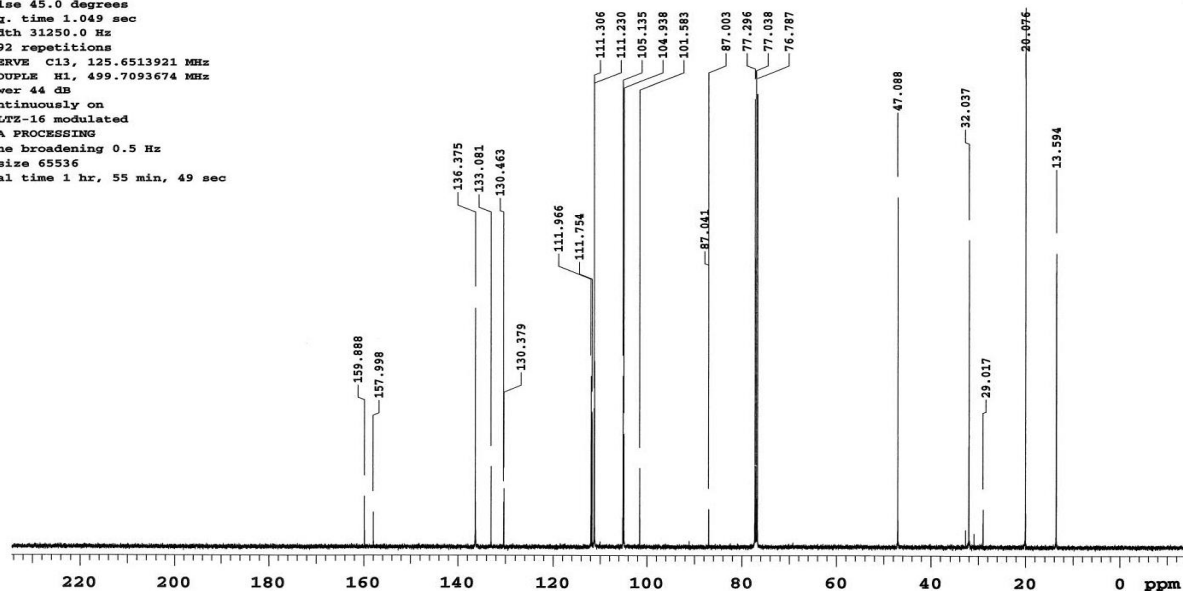

N-Bu\_Indole\_5-F\_3-SeCN

Pulse Sequence: s2pul

Solvent: cdcl3

Temp. 25.0 C / 298.1 K

User: 1-14-87

VMRS-500 "chem-60682"

Relax. delay 5.000 sec

Pulse 45.0 degrees

Acq. time 0.944 sec

Width 277.8 kHz

32 repetitions

OBSERVE Se77, 95.3016605 MHz

DECOUPLE H1, 499.7093674 MHz

Power 44 dB

continuously on

WALTZ-16 modulated

DATA PROCESSING

Line broadening 0.5 Hz

FT size 524288

Total time 3 min, 10 sec

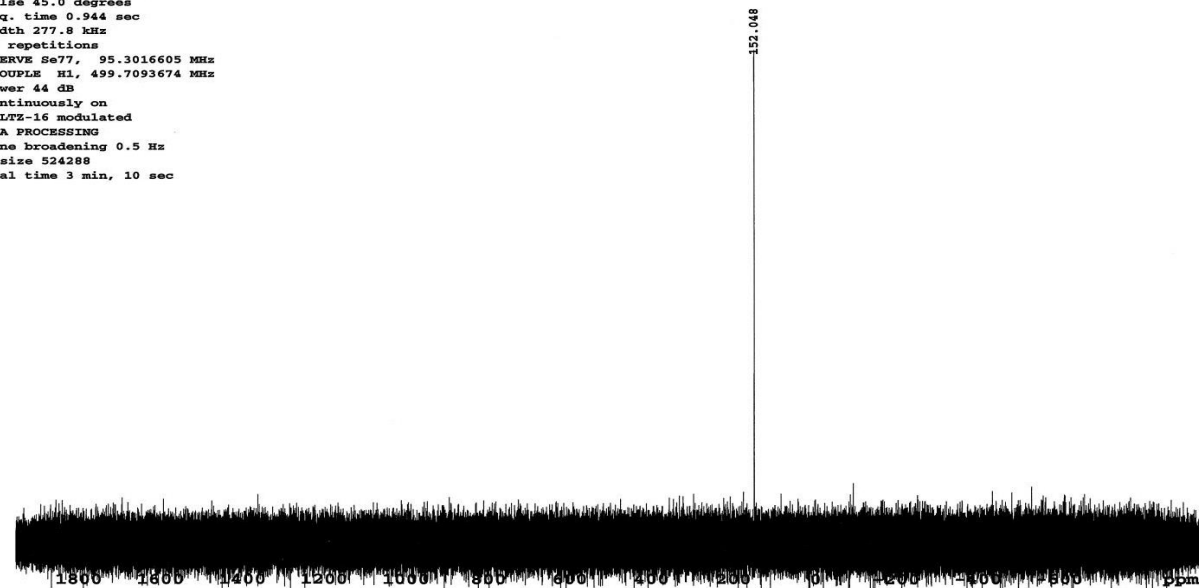



Fig S14.  $^1\text{H}$  and  $^{13}\text{C}$  NMR spectra of the compound 4h

Varian VNMR 500 NMR  
Spectrometer  
SN#P008521

Sample ID number: 6nitroindole  
Project Number:  
Chemist:  
Sample concentration: n/a  
mg/Operator:  
Philip  
Archive directory: Philip  
Date: Mar 09 2018 16-10-09

Pulse Sequence: s2pul

Solvent: dmsc  
Temp. 25.0 C / 298.1 K  
VNMR-500 "chem-60682"

Relax. delay 1.000 sec  
Pulse 45.0 degrees  
Acq. time 2.045 sec  
Width 8012.8 Hz  
64 repetitions  
OBSERVE H1, 499.7092424 MHz  
DATA PROCESSING  
FT size 32768  
Total time 3 min. 15 sec

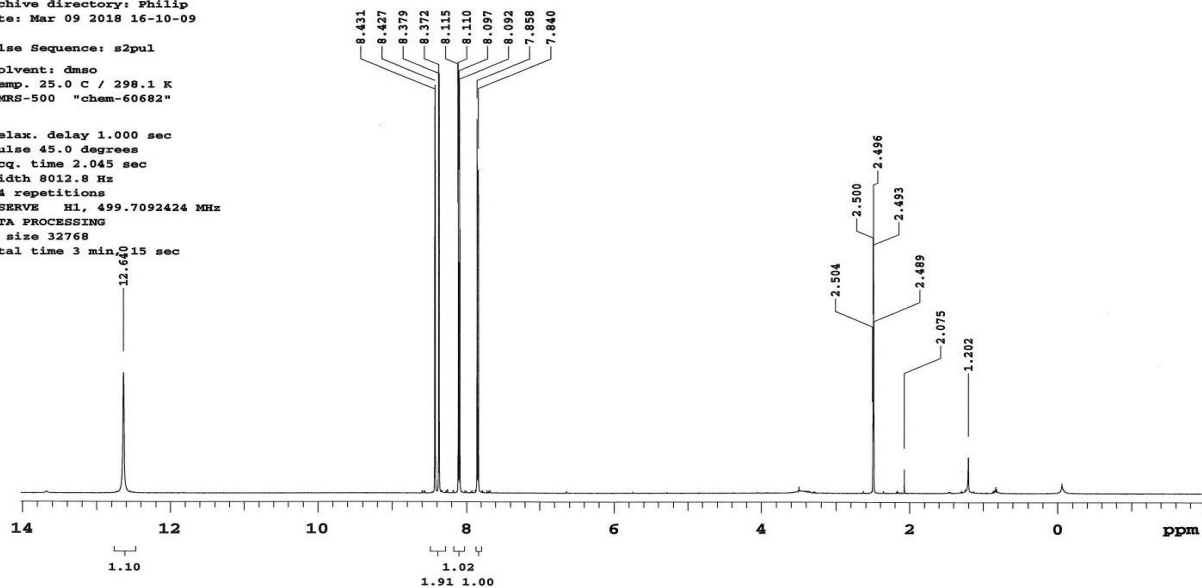

Varian VNMR 500 NMR  
Spectrometer  
SN#P008521

Sample ID number:  
6nitroindolescn  
Project Number:  
Chemist:  
Sample concentration: n/a  
mg/Operator:  
Philip  
Archive directory: Philip  
Date: Mar 09 2018 16-13-41

Pulse Sequence: s2pul

Solvent: dmsc  
Temp. 25.0 C / 298.1 K  
User: 1-14-87  
VNMR-500 "chem-60682"

Relax. delay 1.000 sec  
Pulse 45.0 degrees  
Acq. time 1.049 sec  
Width 31250.0 Hz  
512 repetitions  
OBSERVE C13, 125.6519890 MHz  
DECOUPLE H1, 499.7117410 MHz  
Power 44 dB  
continuously on  
WALTZ-16 modulated  
DATA PROCESSING  
Line broadening 0.5 Hz  
FT size 65536  
Total time 17 min, 29 sec

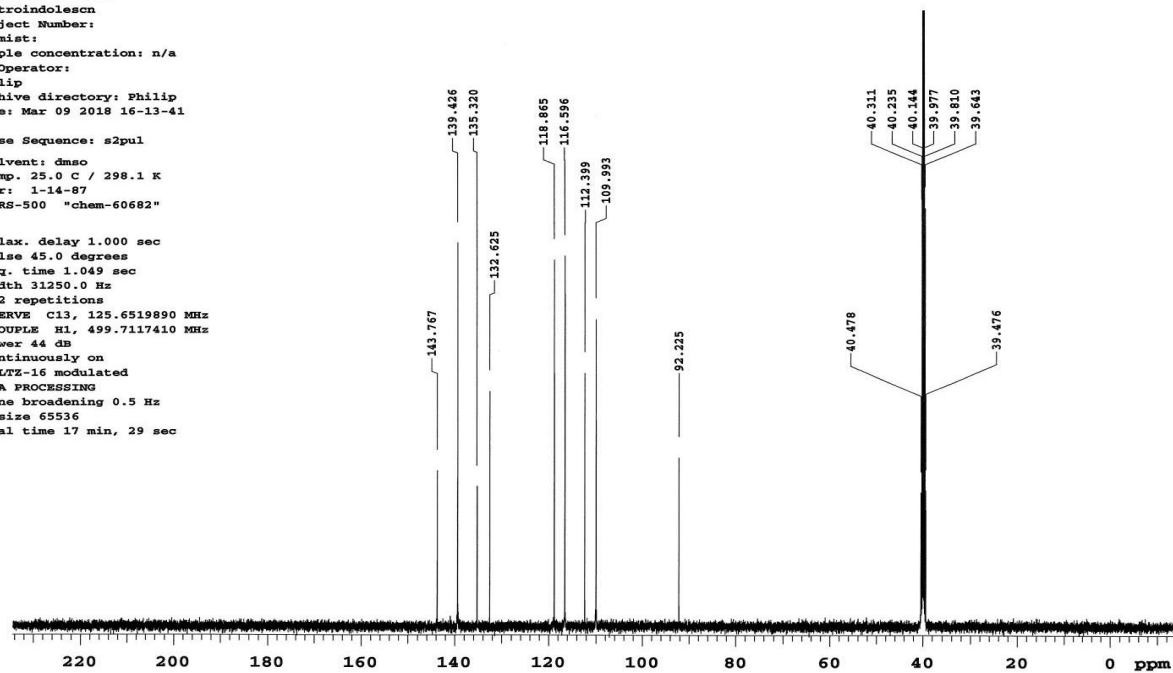

Fig S15.  $^1\text{H}$ ,  $^{13}\text{C}$  and  $^{77}\text{Se}$  NMR spectra of the compound 5h

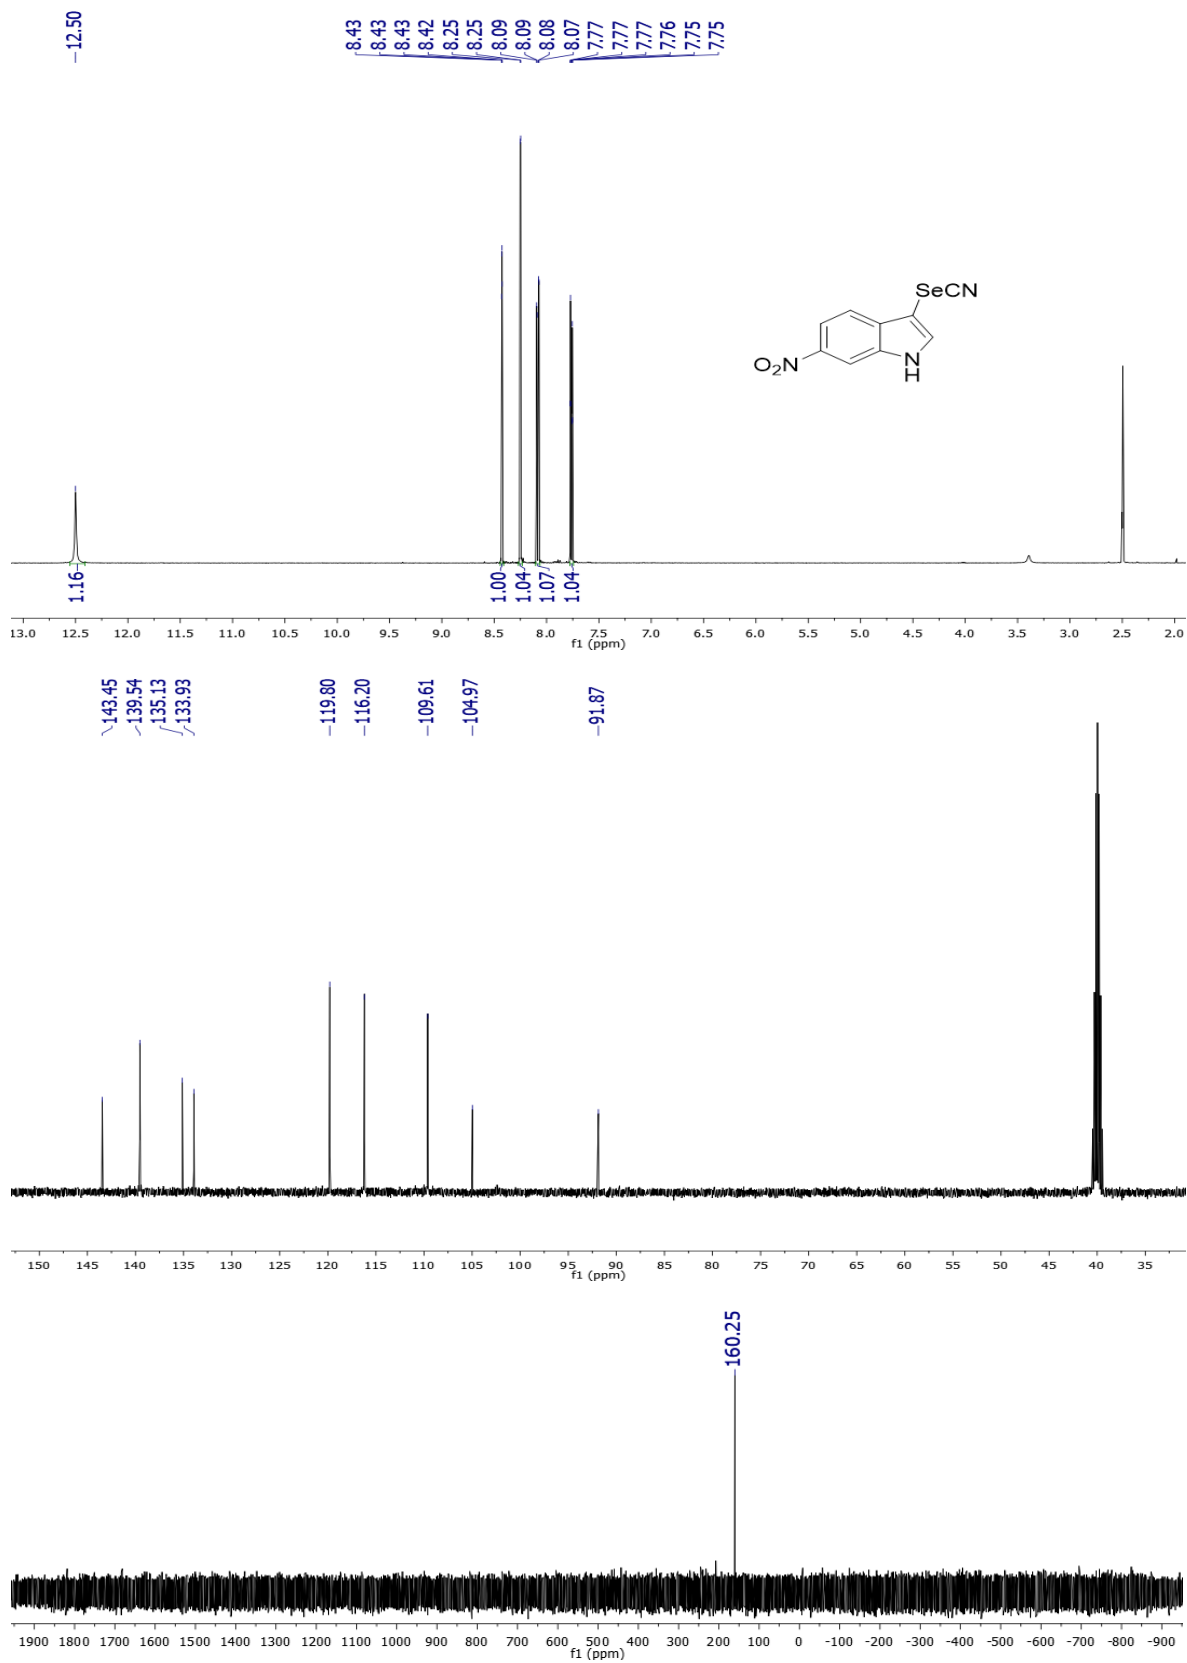

Fig S16.  $^1\text{H}$  and  $^{13}\text{C}$  NMR spectra of the compound 4i

Varian VNMRS 500 NMR  
Spectrometer  
SN#P008521

Sample ID number: 6nitroindole  
Sample concentration: n/a mg  
Operator: Philip  
Archive directory: Philip  
Date: Mar 29 2018 12-36-31

Pulse Sequence: s2pul

Solvent: acetone  
Temp. 25.0 C / 298.1 K  
VNMRS-500 "chem-60682"

Relax. delay 1.000 sec  
Pulse 45.0 degrees  
Acq. time 2.045 sec  
Width 8012.8 Hz  
32 repetitions  
OBSERVE H1, 499.7094623 MHz  
DATA PROCESSING  
FT size 32768  
Total time 1 min, 37 sec

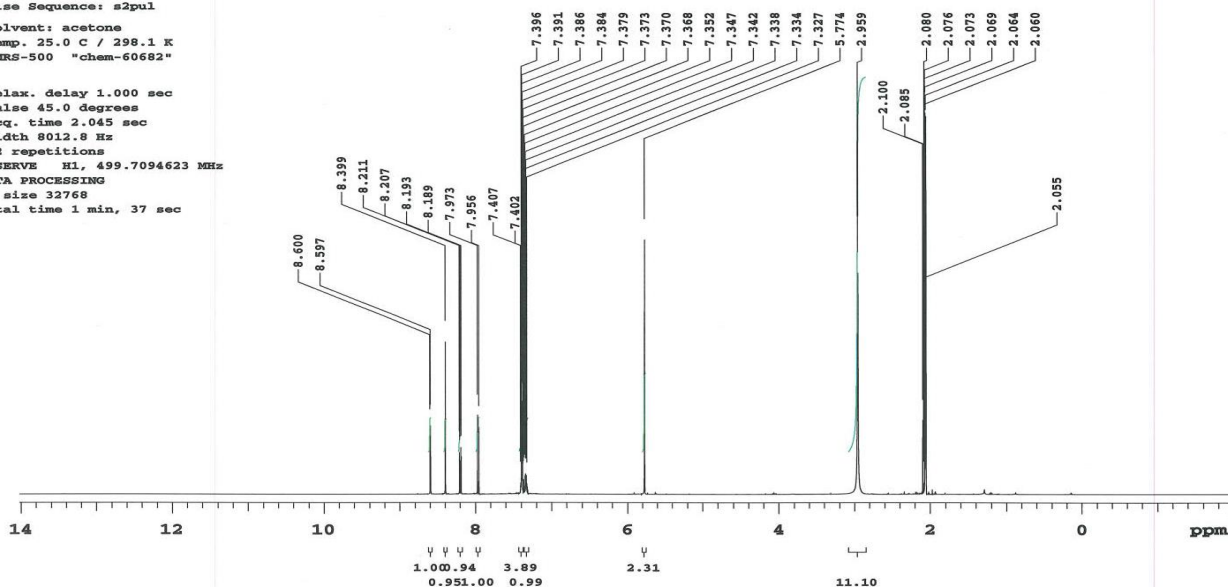

nitro\_indole\_benzyl\_scn

Pulse Sequence: s2pul

Solvent: acetone  
Temp. 25.0 C / 298.1 K  
User: 1-14-87  
VNMRS-500 "chem-60682"

Relax. delay 1.000 sec  
Pulse 45.0 degrees  
Acq. time 1.049 sec  
Width 31250.0 Hz  
1000 repetitions  
OBSERVE C13, 125.6520442 MHz  
DECOUPLE H1, 499.7119609 MHz  
Power 44 dB  
continuously on  
WALTZ-16 modulated  
DATA PROCESSING  
Line broadening 0.5 Hz  
FT size 65536  
Total time 34 min, 9 sec

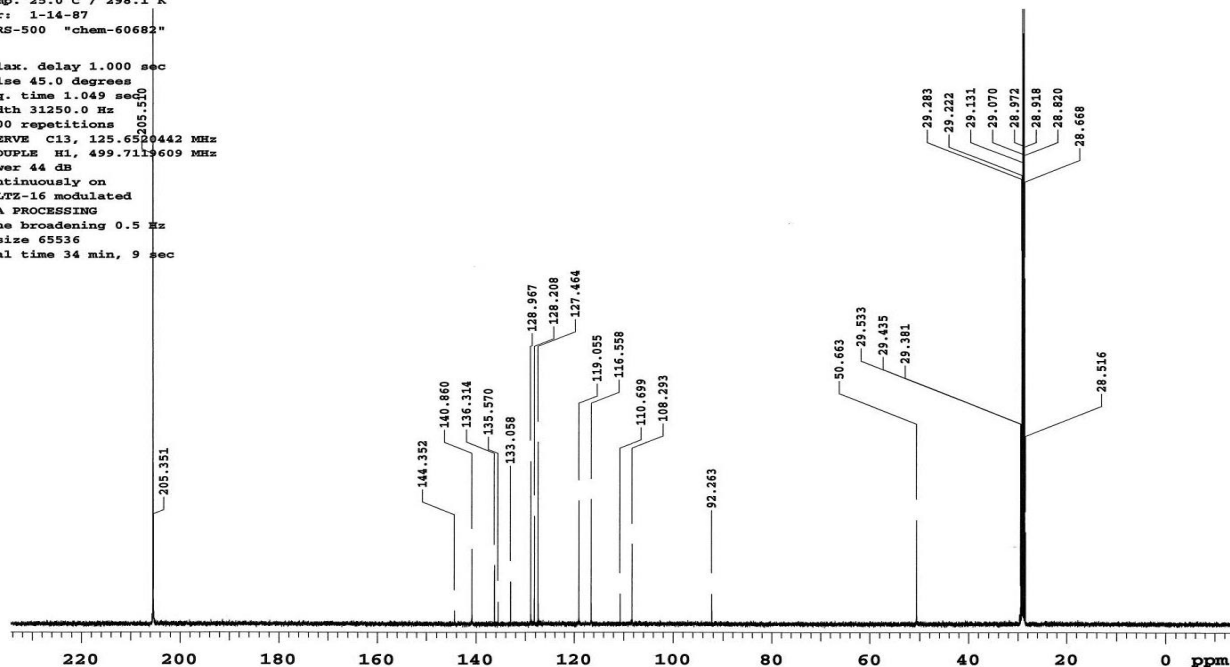

Fig S17.  $^1\text{H}$  and  $^{13}\text{C}$  NMR spectra of the compound 5i

Varian VNMR 500 NMR  
Spectrometer  
SN#P008521

Sample ID number: n  
Sample concentration: n/a mg  
Operator: Philip  
Archive directory: Philip  
Date: Apr 09 2018 12-28-06

Pulse Sequence: s2pul  
Solvent: cdcl3  
Temp. 25.0 C / 298.1 K  
VNMR-500 "chem-60682"

Relax. delay 1.000 sec  
Pulse 45.0 degrees  
Acq. time 2.045 sec  
Width 8012.8 Hz  
64 repetitions  
OBSERVE H1, 499.7068688 MHz  
DATA PROCESSING  
FT size 32768  
Total time 3 min, 15 sec

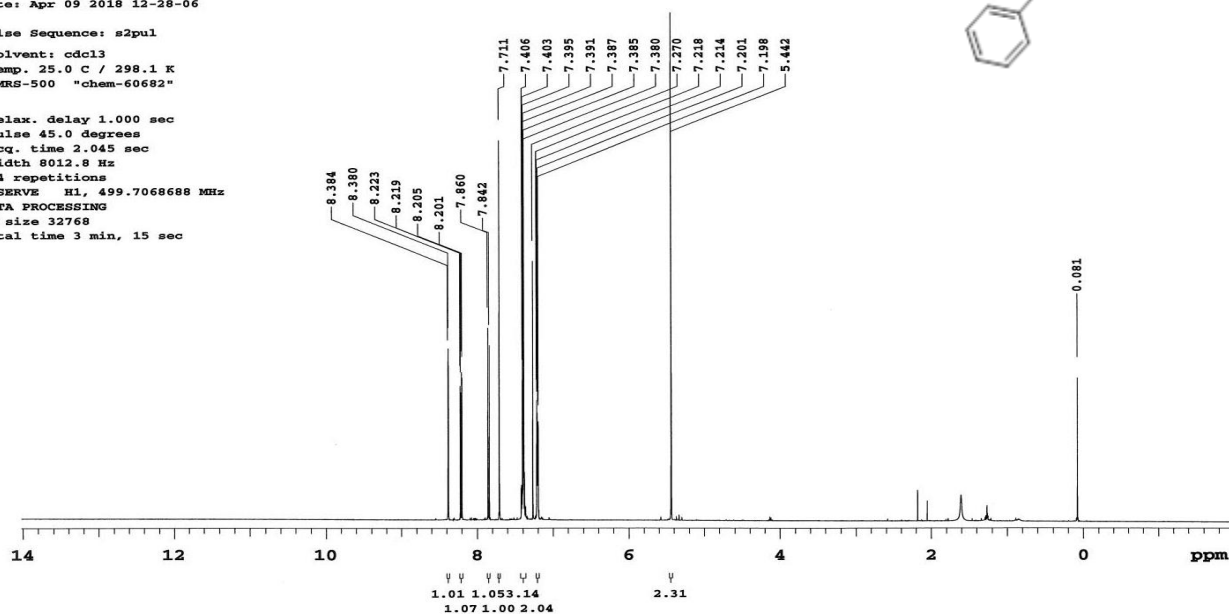

6-nitro\_n\_bz\_secn\_indole

Pulse Sequence: s2pul  
Solvent: cdcl3  
Temp. 25.0 C / 298.1 K  
User: 1-14-87  
VNMR-500 "chem-60682"

Relax. delay 1.000 sec  
Pulse 45.0 degrees  
Acq. time 1.049 sec  
Width 31250.0 Hz  
256 repetitions  
OBSERVE C13, 125.6513921 MHz  
DECOUPLE H1, 499.7093674 MHz  
Power 44 dB  
continuously on  
WALTZ-16 modulated  
DATA PROCESSING  
Line broadening 0.5 Hz  
FT size 65536  
Total time 8 min, 44 sec

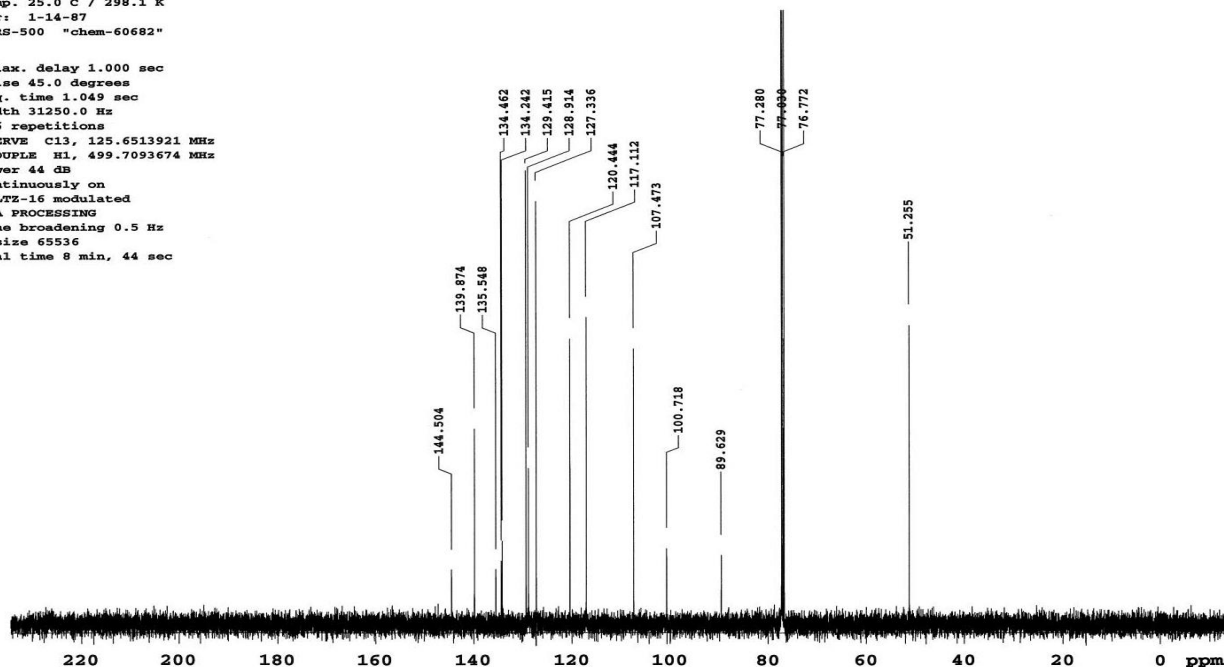

Fig S18.  $^1\text{H}$  and  $^{13}\text{C}$  NMR spectra of the compound 4j

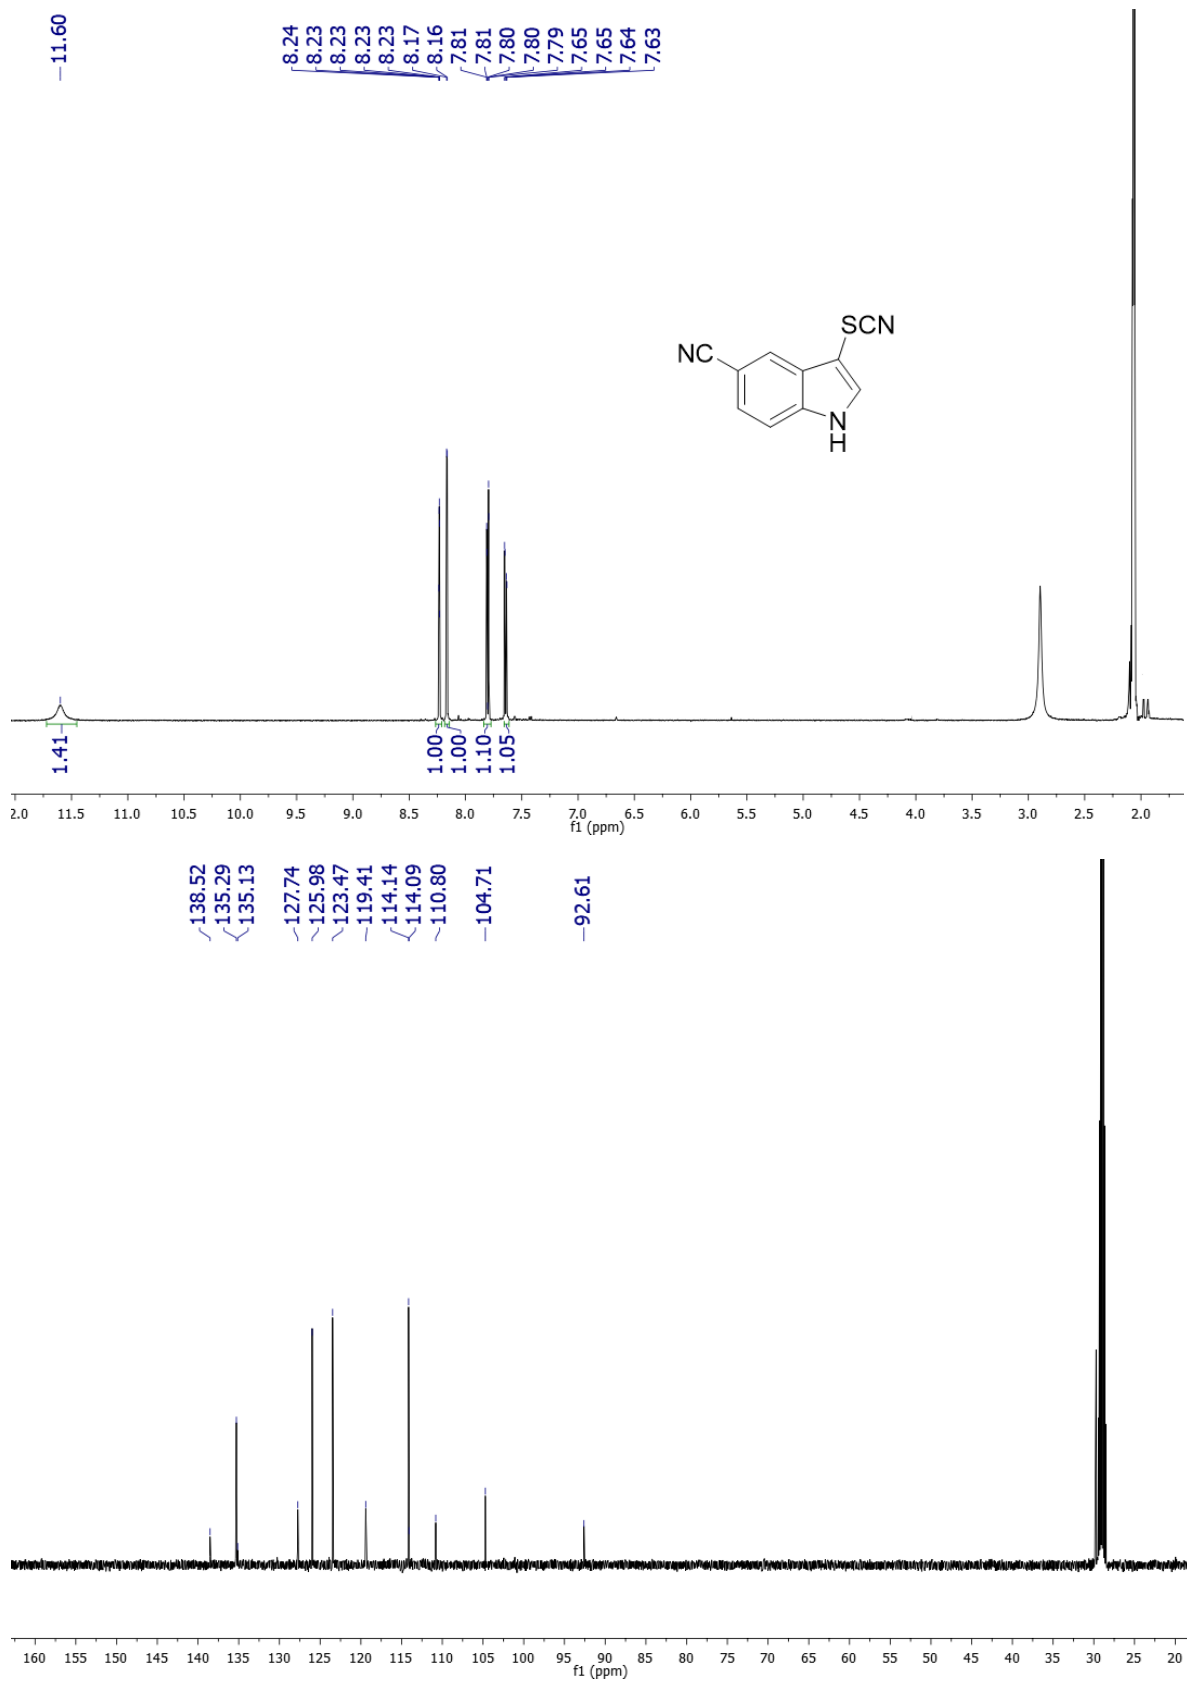

Fig S19.  $^1\text{H}$  and  $^{13}\text{C}$  NMR spectra of the compound 7a

Varian VNMRS 500 NMR  
Spectrometer  
SN#P008521

Sample ID number:  
carbazole-4-SCN  
Project Number:  
Chemist:  
Sample concentration: n/a  
mg/Operator:  
Philip  
Archive directory: Philip  
Date: Feb 14 2018 16-14-55

Pulse Sequence: s2pul  
Solvent: cdcl3  
Temp. 25.0 C / 298.1 K  
VNMRS-500 "chem-60682"

Relax. delay 1.000 sec  
Pulse 45.0 degrees  
Acq. time 2.045 sec  
Width 8012.8 Hz  
32 repetitions  
OBSERVE H1, 499.7068688 MHz  
DATA PROCESSING  
FT size 32768  
Total time 1 min, 37 sec

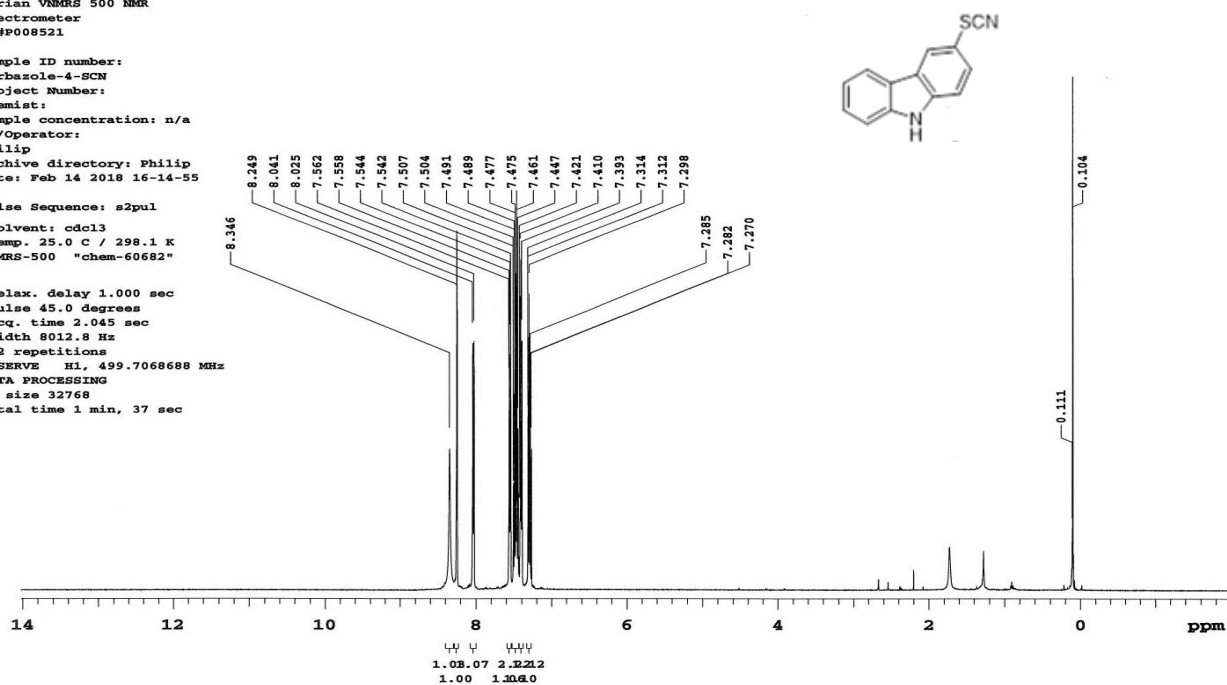

Varian VNMRS 500 NMR  
Spectrometer  
SN#P008521

Sample ID number:  
carbazole-4-SCN  
Project Number:  
Chemist:  
Sample concentration: n/a  
mg/Operator:  
Philip  
Archive directory: Philip  
Date: Feb 14 2018 17-02-46

Pulse Sequence: s2pul  
Solvent: cdcl3  
Temp. 25.0 C / 298.1 K  
User: 1-14-87  
VNMRS-500 "chem-60682"

Relax. delay 1.000 sec  
Pulse 45.0 degrees  
Acq. time 1.049 sec  
Width 31250.0 Hz  
1000 repetitions  
OBSERVE C13, 125.6513921 MHz  
DECOUPLE H1, 499.7093674 MHz  
Power 44 dB  
continuously on  
WALTZ-16 modulated  
DATA PROCESSING  
Line broadening 0.5 Hz  
FT size 65536  
Total time 34 min, 9 sec

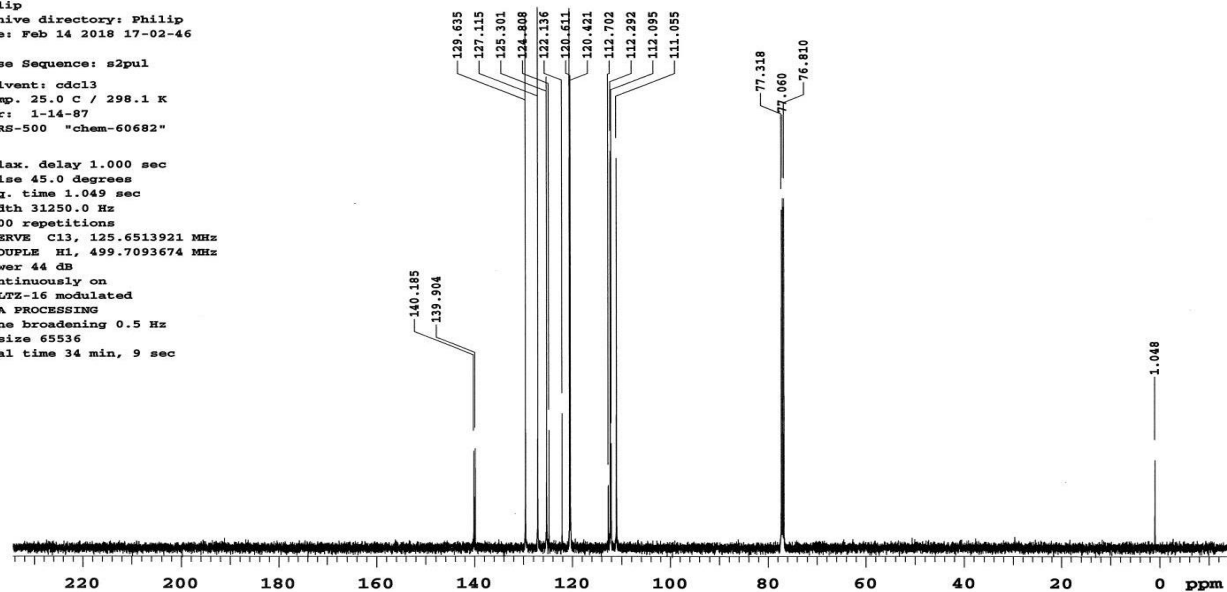

Fig S20.  $^1\text{H}$ ,  $^{13}\text{C}$  and  $^{77}\text{Se}$  NMR spectra of the compound 8a

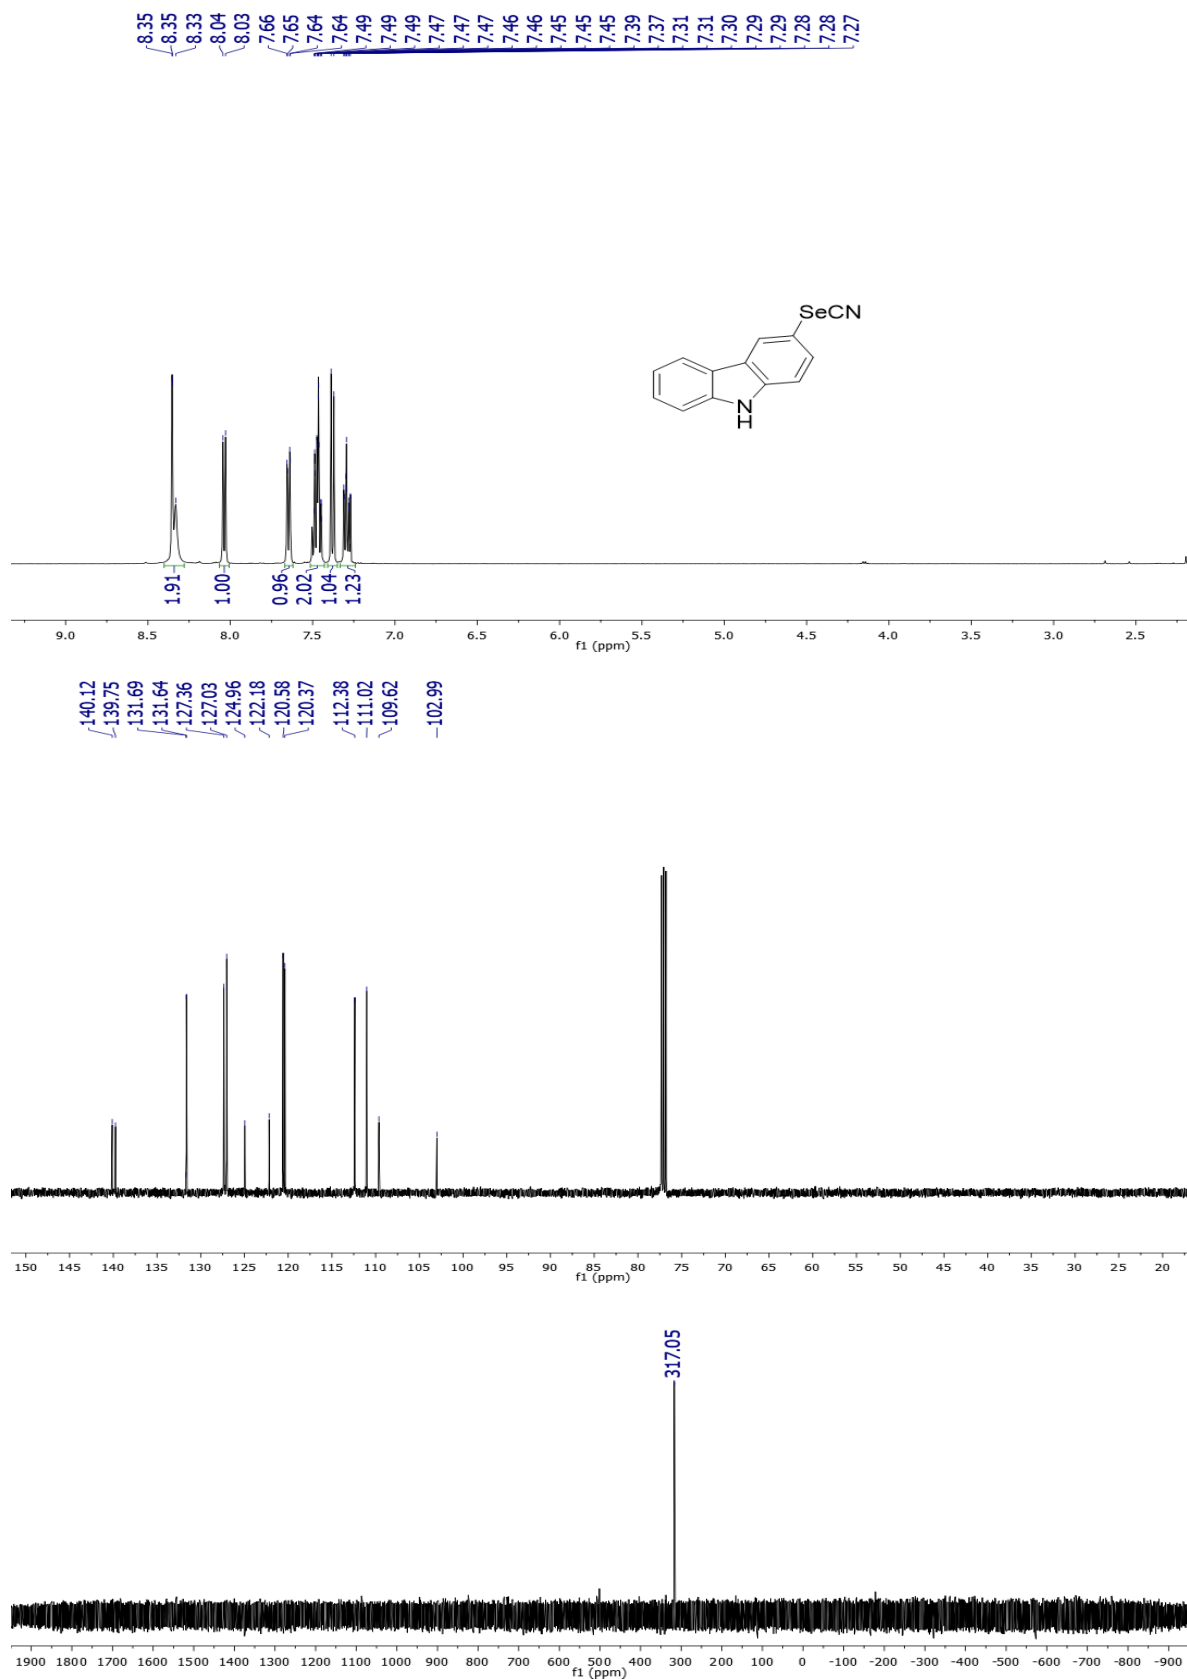

Fig S21.  $^1\text{H}$  and  $^{13}\text{C}$  NMR spectra of the compound 7b

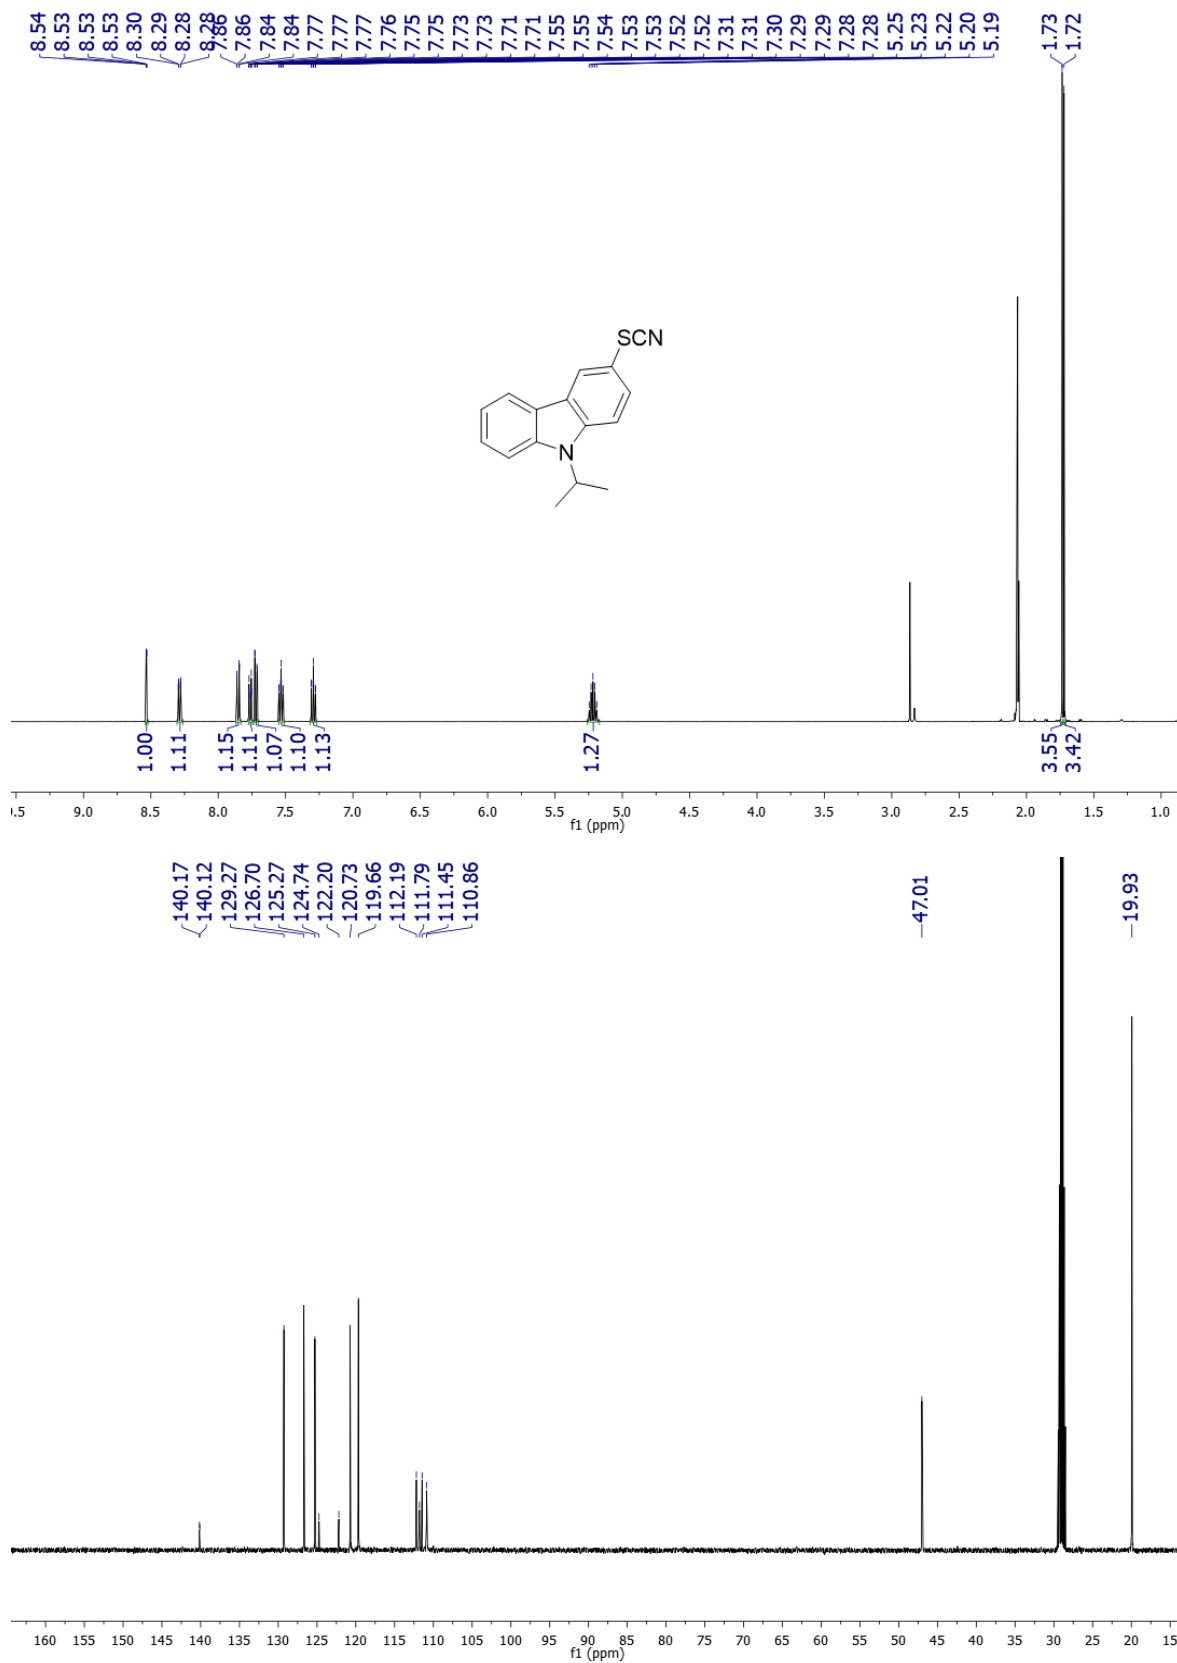



Fig S22.  $^1\text{H}$ ,  $^{13}\text{C}$  and  $^{77}\text{Se}$  NMR spectra of the compound 8b

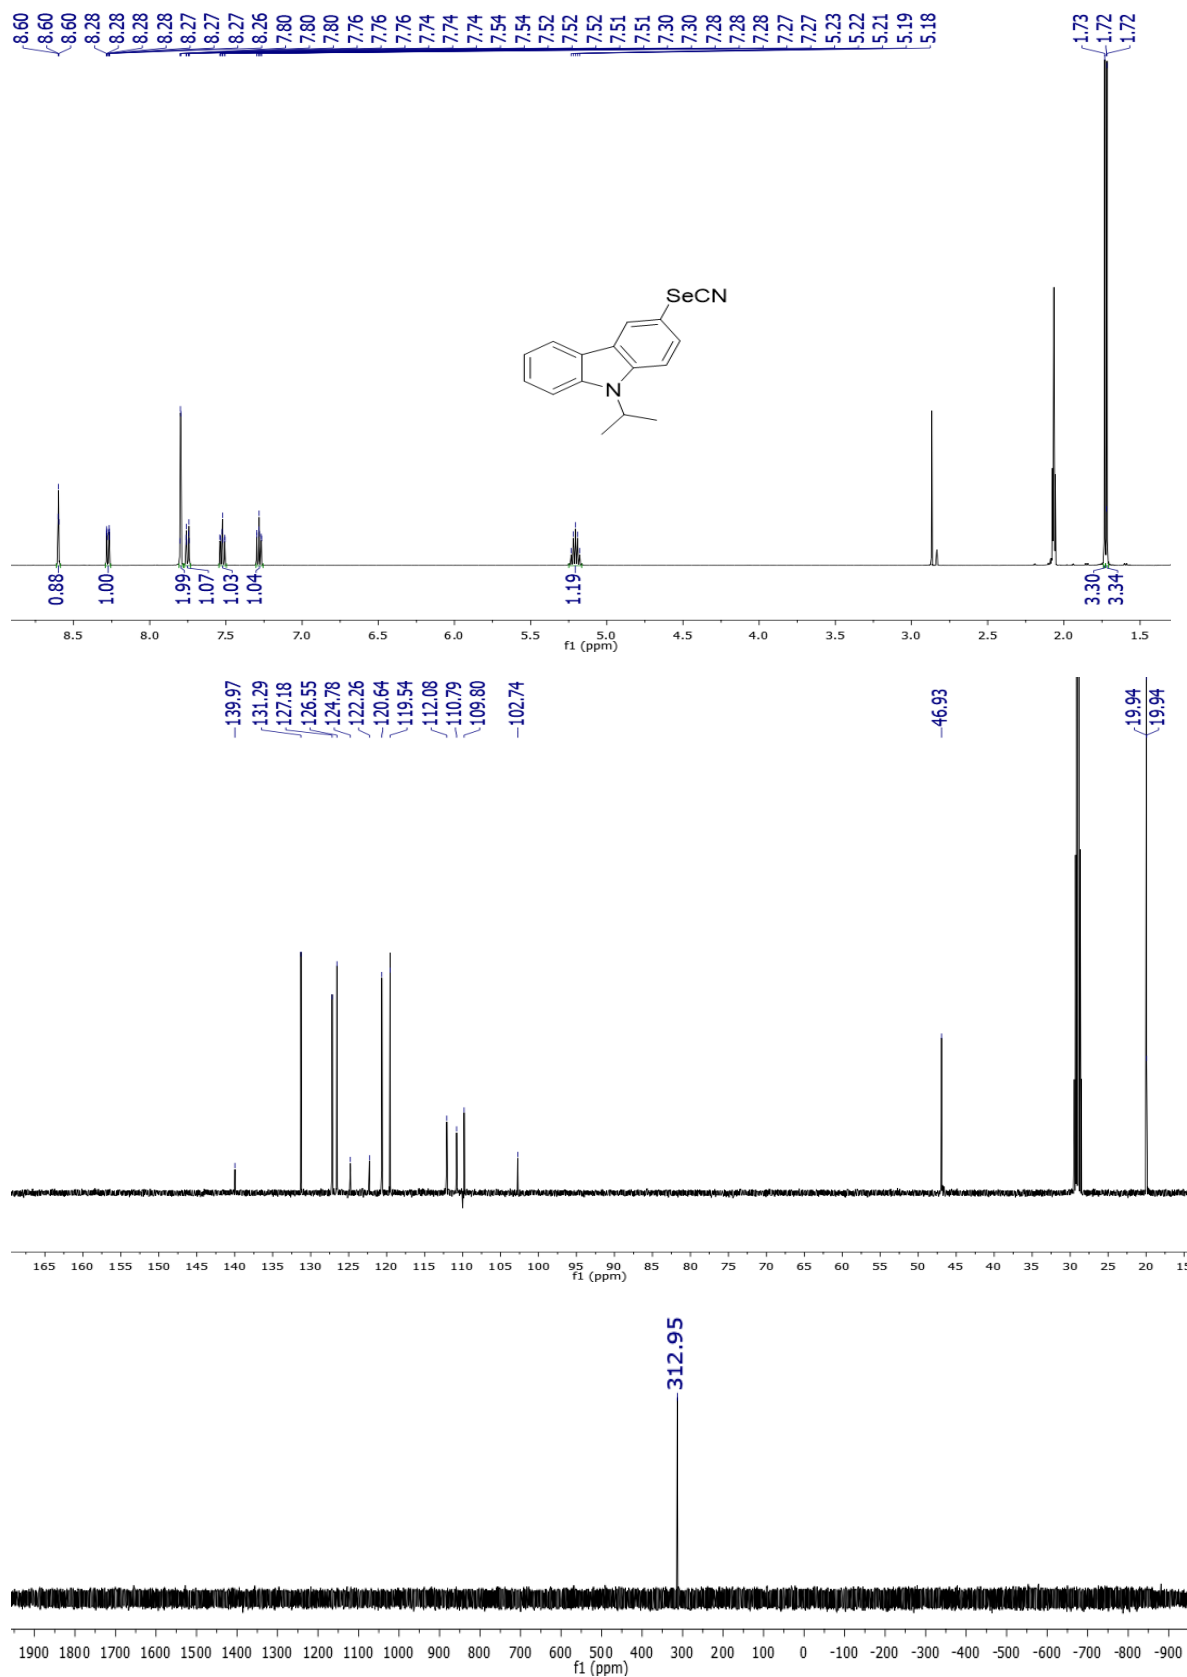

Chemical structure: N#CSeC(=O)c1ccc2c(c1)c(c3ccc(N=[N+]#S)cc32)

<sup>1</sup>H NMR (ppm): 11.09, 8.72, 8.65, 7.87, 7.86, 7.85, 7.85, 7.76, 7.76, 7.72, 7.72, 7.70, 7.70, 3.0, 2.0

<sup>13</sup>C NMR (ppm): 141.21, 141.18, 132.58, 130.33, 127.77, 125.72, 123.62, 123.59, 113.37, 113.31, 113.29, 113.27, 113.23, 113.15, 111.61, 111.55, 102.68

Fig S24.  $^1\text{H}$ ,  $^{13}\text{C}$  and  $^{77}\text{Se}$  NMR spectra of the compound 10

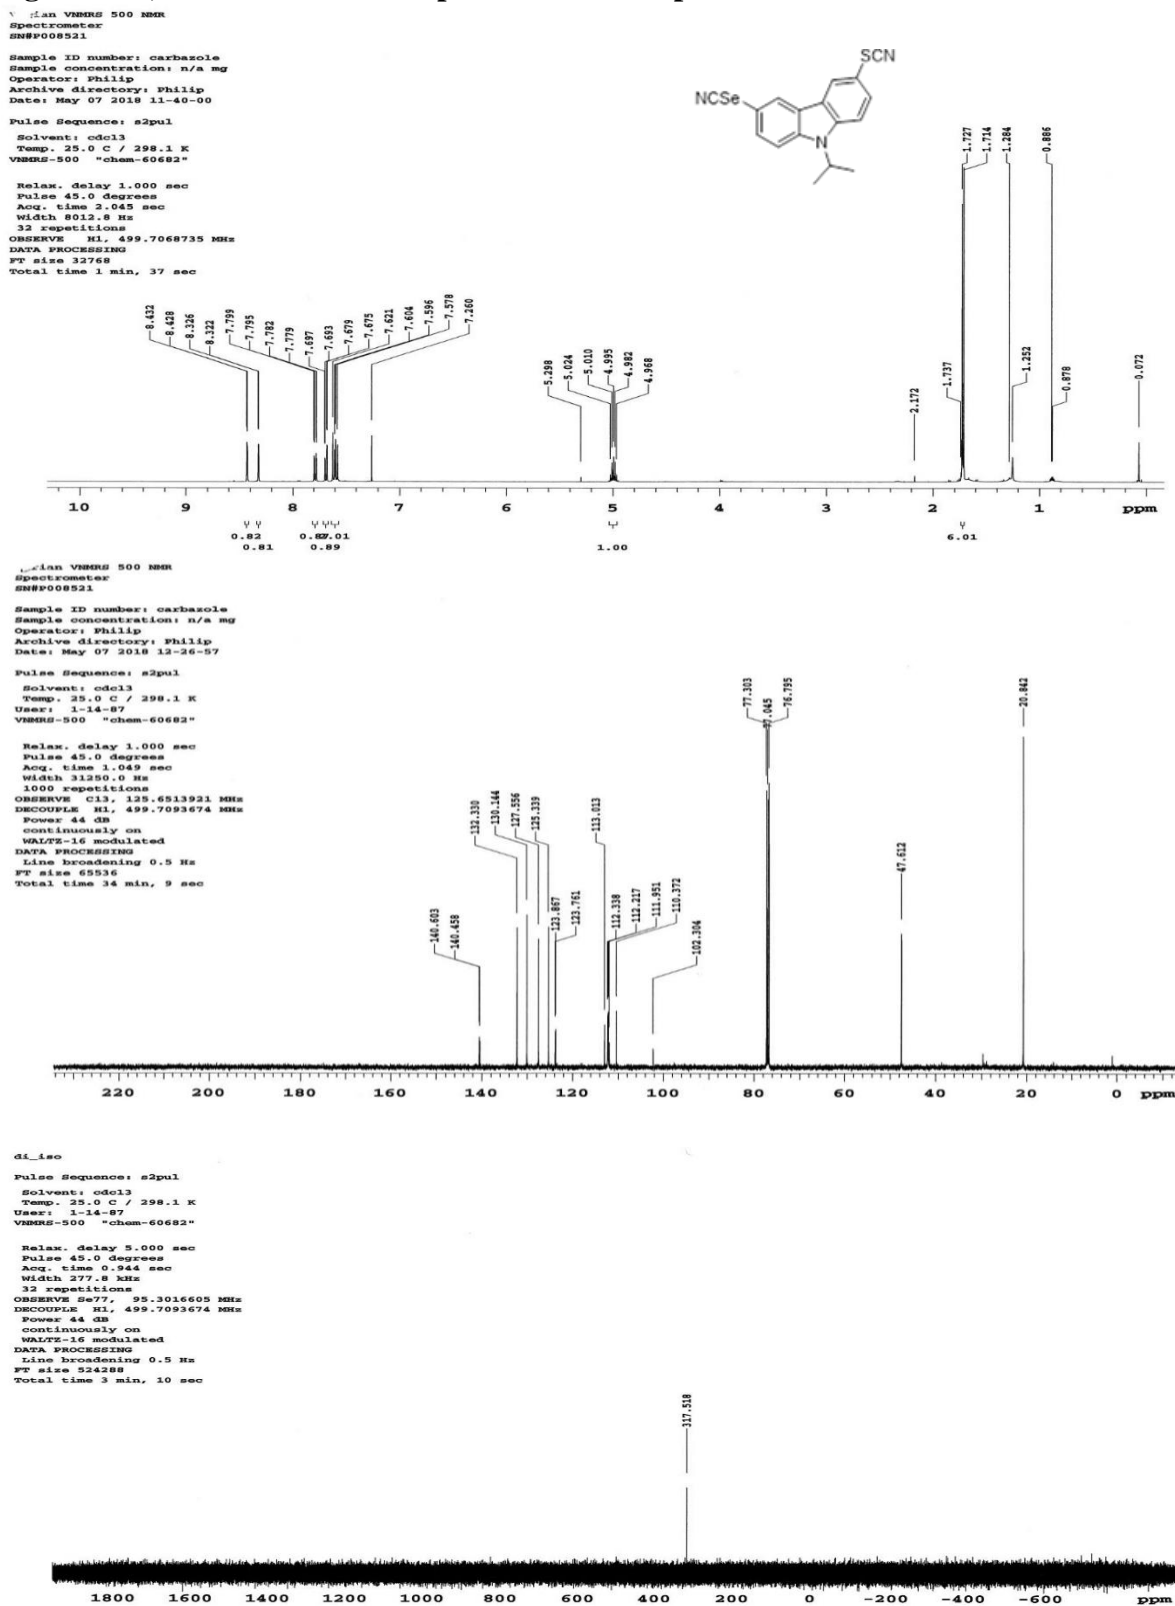

Fig S25.  $^1\text{H}$  and  $^{13}\text{C}$  NMR spectra of the compound 11b

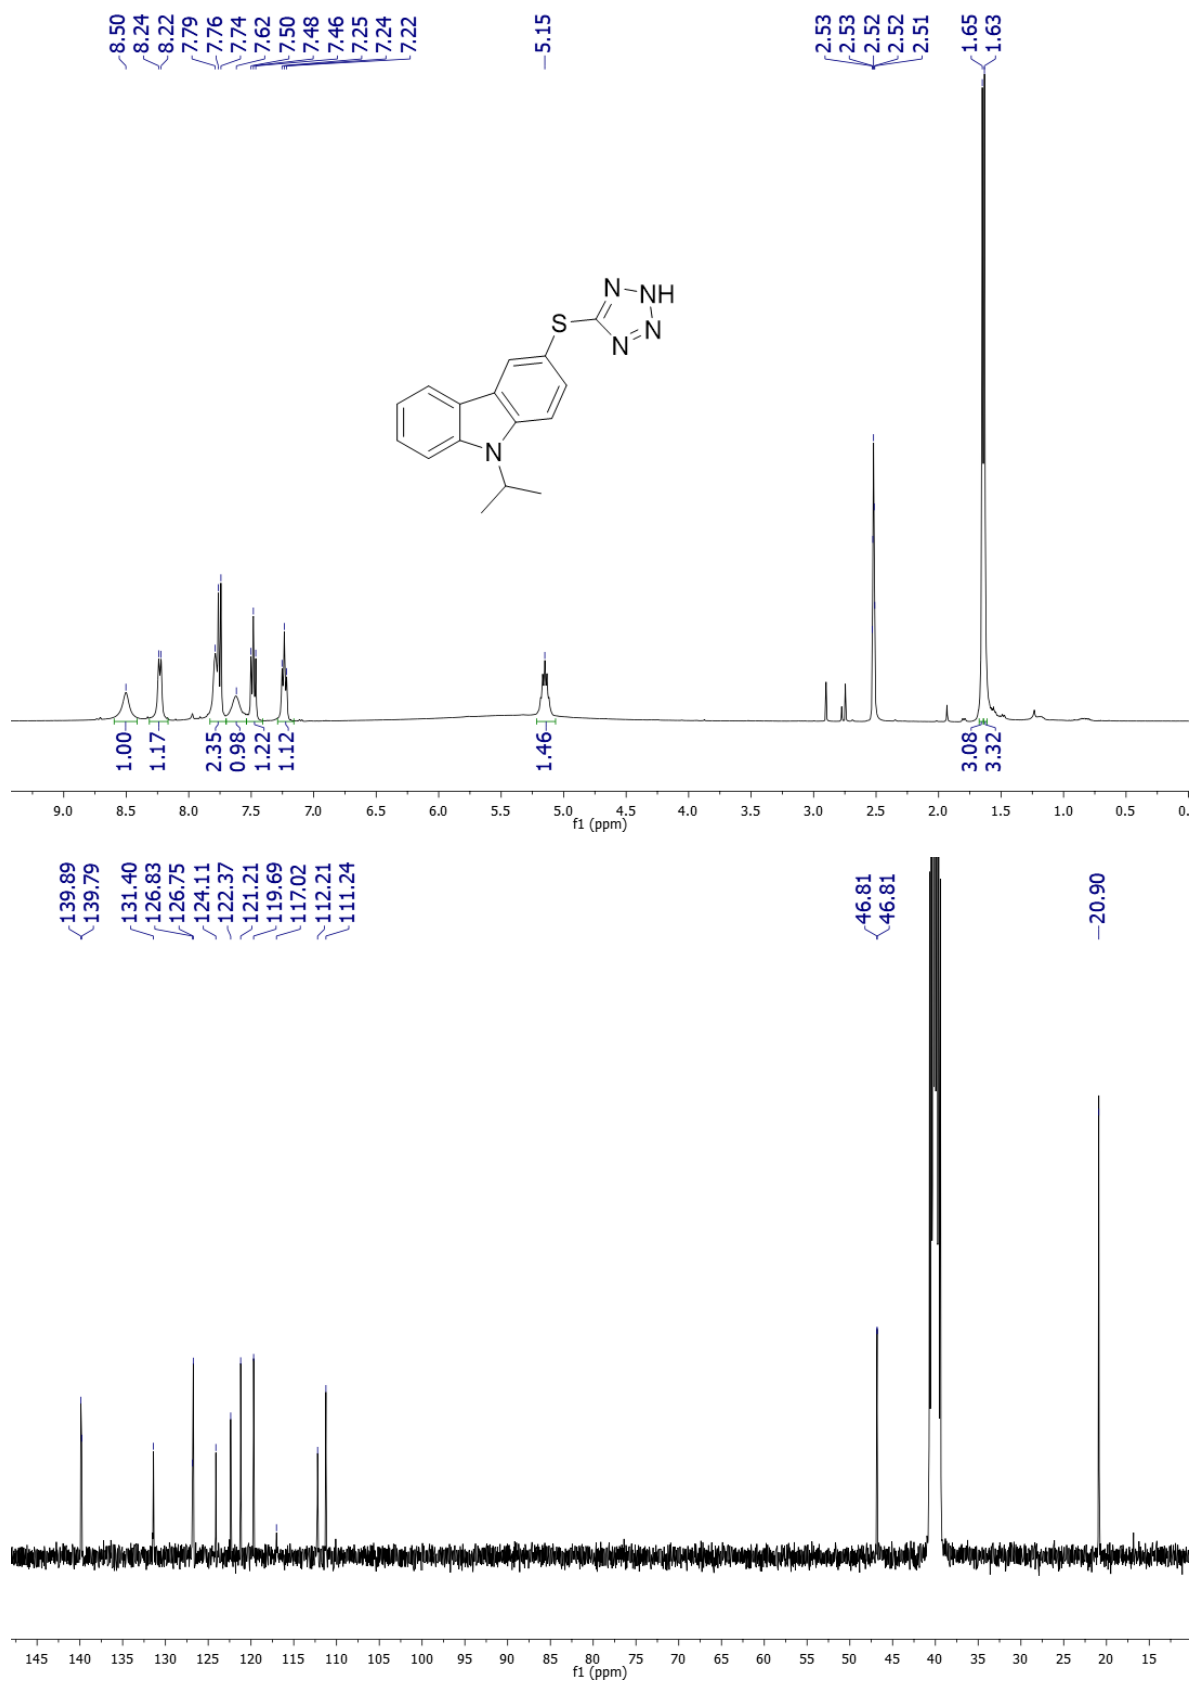

Fig S26.  $^1\text{H}$  and  $^{13}\text{C}$  NMR spectra of the compound 12b

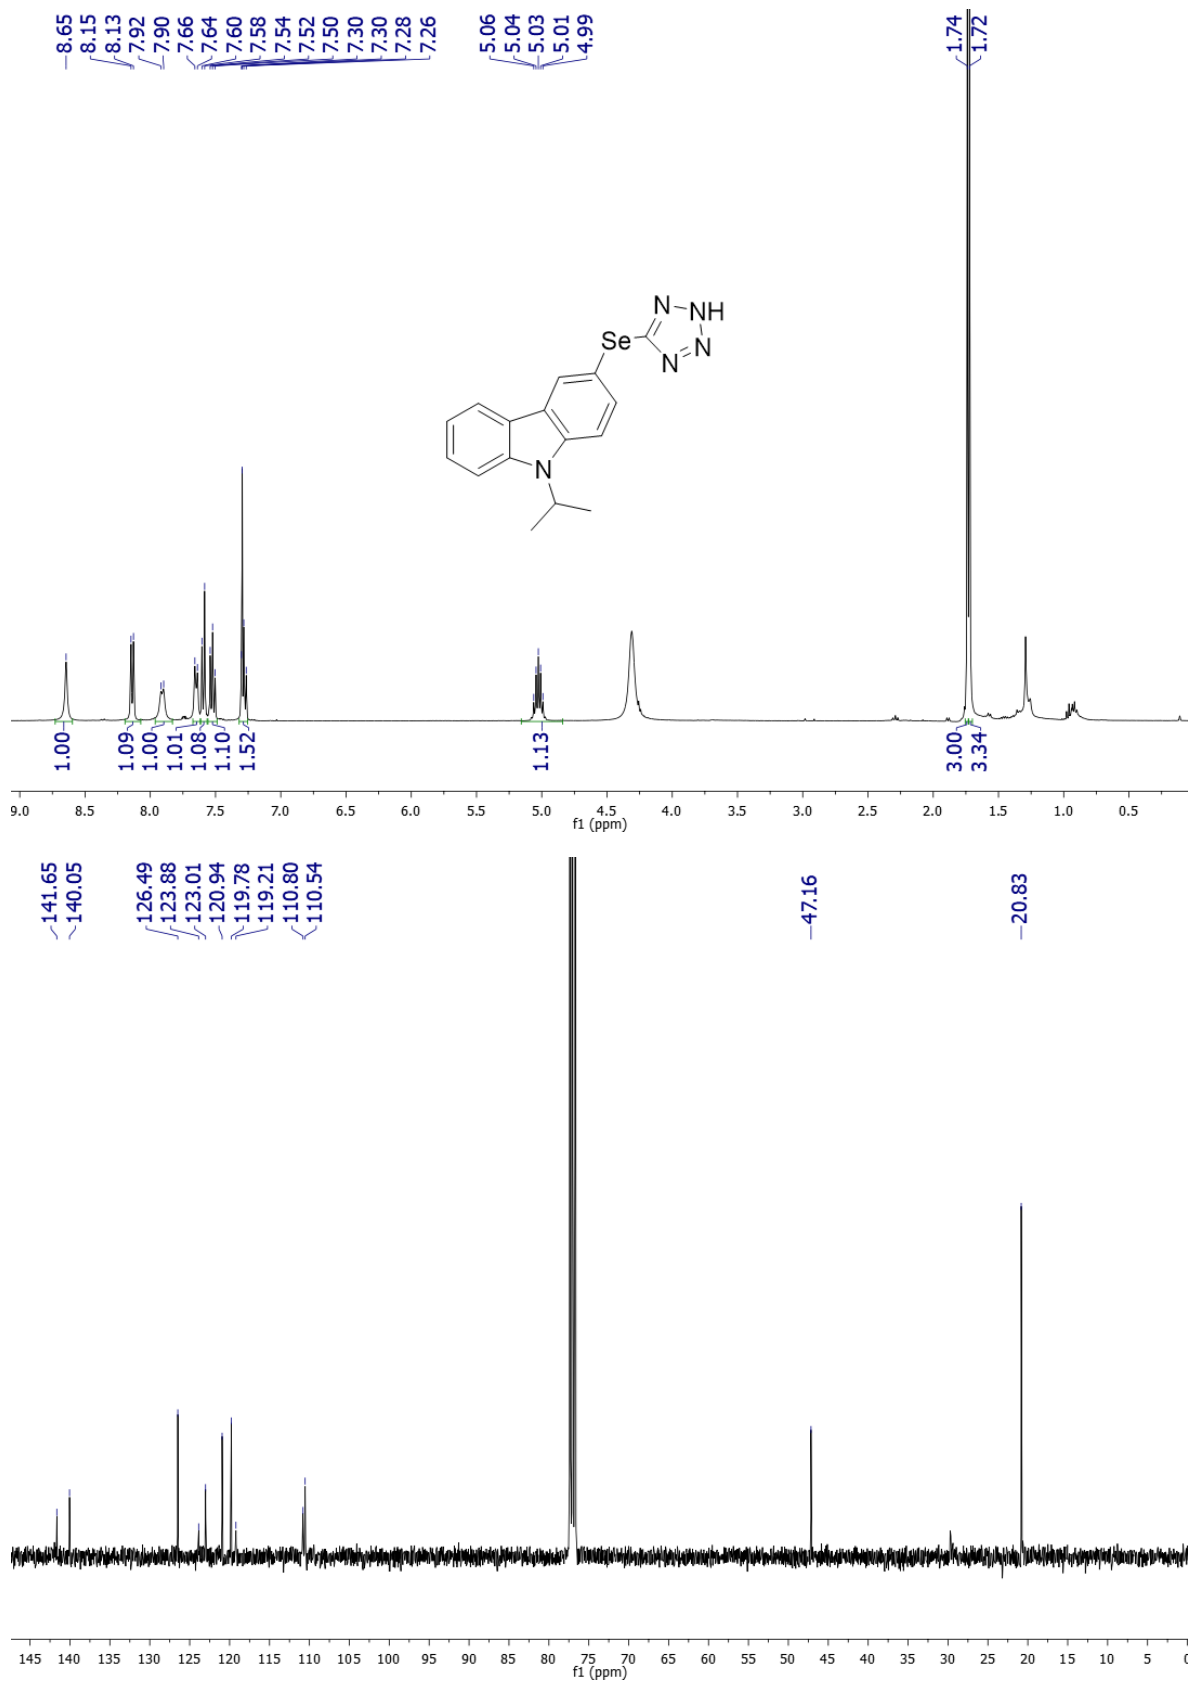

Supplement: f1 [file 1459681.f1.pdf]
